# Supplementary material for: Sterically controlled naphthalene homo-oligoamides with novel structural architectures
Source: Royal Society of Chemistry journal article supplement (doi:10.1039/b822076j), 2009-01-01
Supplement: b822076j.pdf [file b822076j.pdf]

# Electronic Supplementary Information

## *Sterically Controlled Naphthalene Homo-Oligoamides with Novel Structural Architectures*

*Panchami Prabhakaran,<sup>a</sup> Vedavati G. Puranik,<sup>b</sup> Jima N. C,<sup>c</sup> P. R. Rajamohanan,<sup>\*c</sup> Hans-Jörg Hofmann<sup>\*d</sup> and Gangadhar J. Sanjayan<sup>\*a</sup>.*

<sup>a</sup>Division of Organic Chemistry, <sup>b</sup>Center for Materials Characterization, <sup>c</sup>Central NMR Facility, National Chemical Laboratory, Dr. Homi Bhabha Road, Pune 411 008, India

<sup>d</sup>Universität Leipzig, Fakultät für Biowissenschaften, Pharmazie und Psychologie, Institut für Biochemie, Brüderstraße 34, D-04103 Leipzig, Germany

|                                                                                   |         |
|-----------------------------------------------------------------------------------|---------|
| Contents                                                                          | S1      |
| General Methods                                                                   | S2      |
| Mass spectra of <b>2-4</b> and <b>6-8</b>                                         | S3-S5   |
| <sup>1</sup> H NMR spectra <b>2-4</b> and <b>6-8</b>                              | S6-S8   |
| <sup>13</sup> C and DEPT-135 spectra <b>2-4</b> and <b>6-8</b>                    | S9-S14  |
| Dilution and Titration studies on <b>3a</b> , <b>4</b> , <b>7a</b> , and <b>8</b> | S15-S20 |
| 2D COSY, HSQC and HMBC of <b>3a</b> and <b>7a</b>                                 | S21-S22 |
| 2D HSQC and HMBC assignments of <b>3a</b> and <b>7a</b>                           | S23-S24 |
| 2D COSY, TOCSY and NOESY spectra of <b>4</b> and <b>8</b>                         | S25-S29 |
| Details of the <i>ab initio</i> MO calculations                                   | S30-S37 |

## General Methods

Unless otherwise stated, all the chemicals and reagents were obtained commercially. Dichloromethane was dried by distilling over  $P_2O_5$  and kept over 4 Å mol sieves. Analytical thin layer chromatography was done on precoated silica gel plates (Kieselgel 60F<sub>254</sub>, Merck). Column chromatographic purifications were done with 100-200 Mesh Silica gel. NMR spectra were recorded in  $CDCl_3$  on AV 200 MHz, AV 400 MHz or AV-500 MHz Bruker NMR spectrometers. All chemical shifts are reported in  $\delta$  ppm downfield to TMS and peak multiplicities as singlet (s), doublet (d), quartet (q), broad (b) broad singlet (bs), and multiplet (m). Elemental analyses were performed on an Elmentar-Vario-EL (Heraeus Company Ltd., Germany). IR spectra were recorded in  $CHCl_3$  using Shimadzu FTIR-8400 spectrophotometer. Melting points were determined on a Buchi Melting Point B-540. Electron Scattered Ionization (ESI) Mass Spectrometric measurements were done with API QSTAR Pulsar mass Spectrometer. The quantum chemical calculations were done employing the Gaussian 03 program package (Gaussian, Inc, Wallingford, CT 06492, USA).

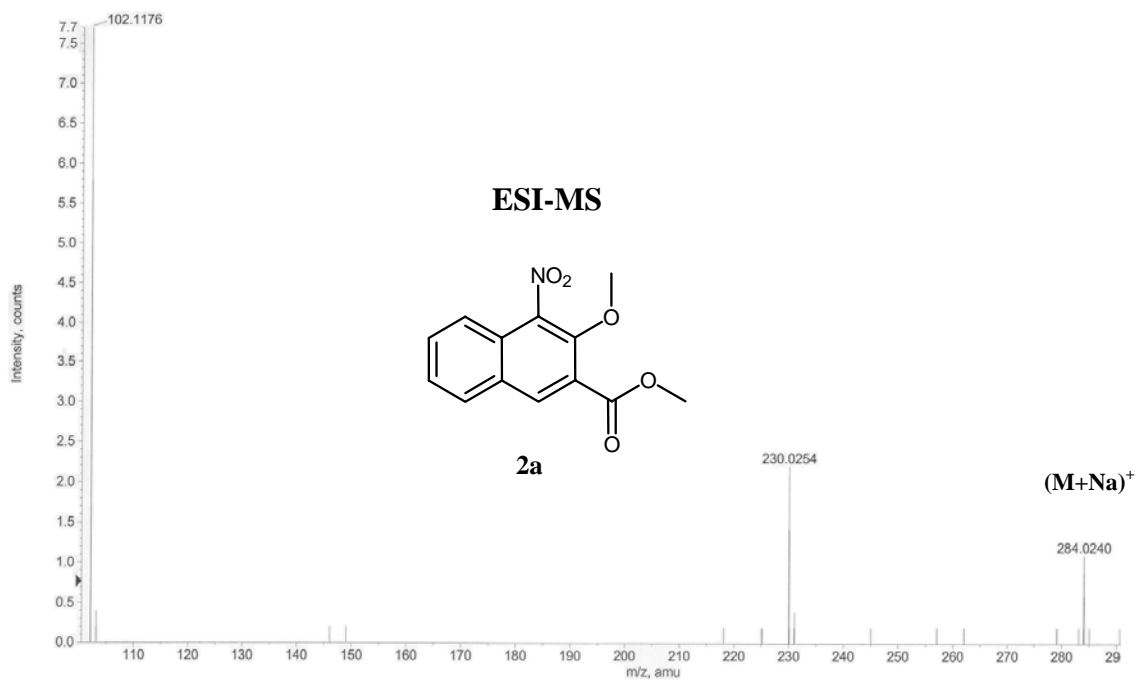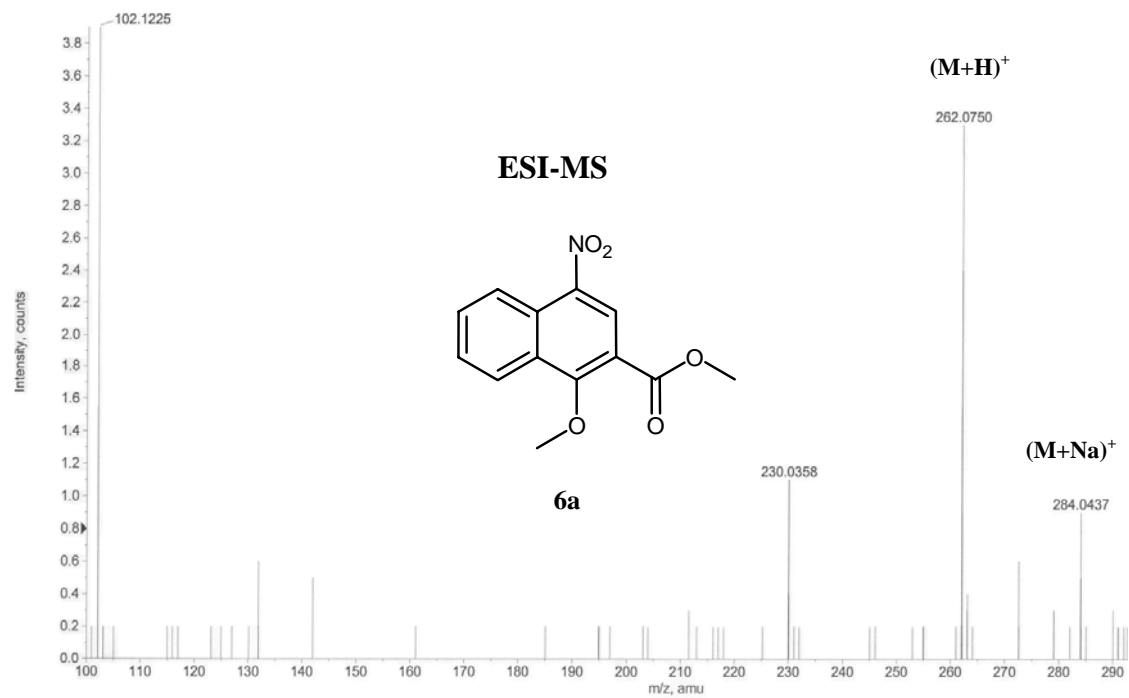

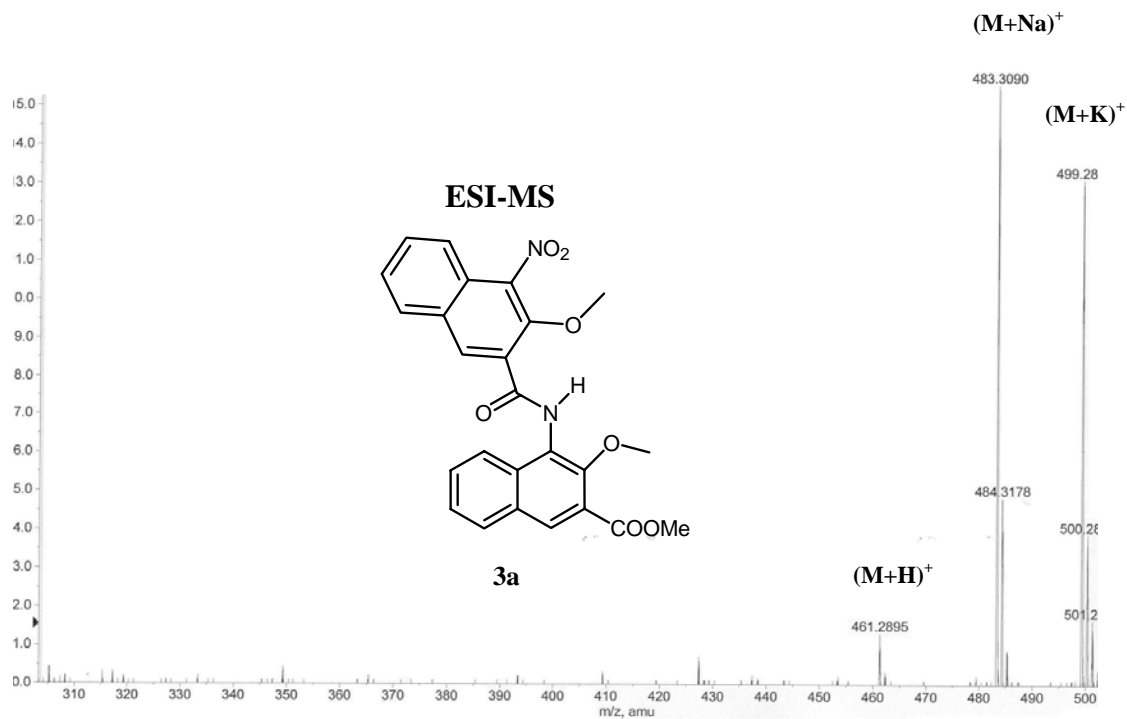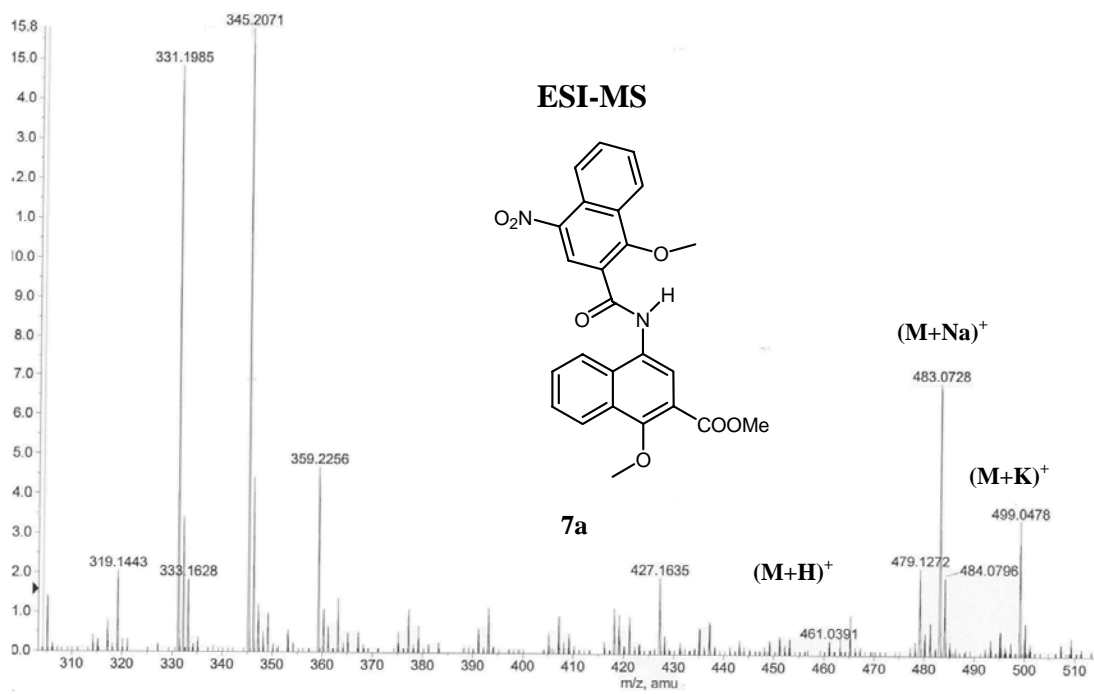

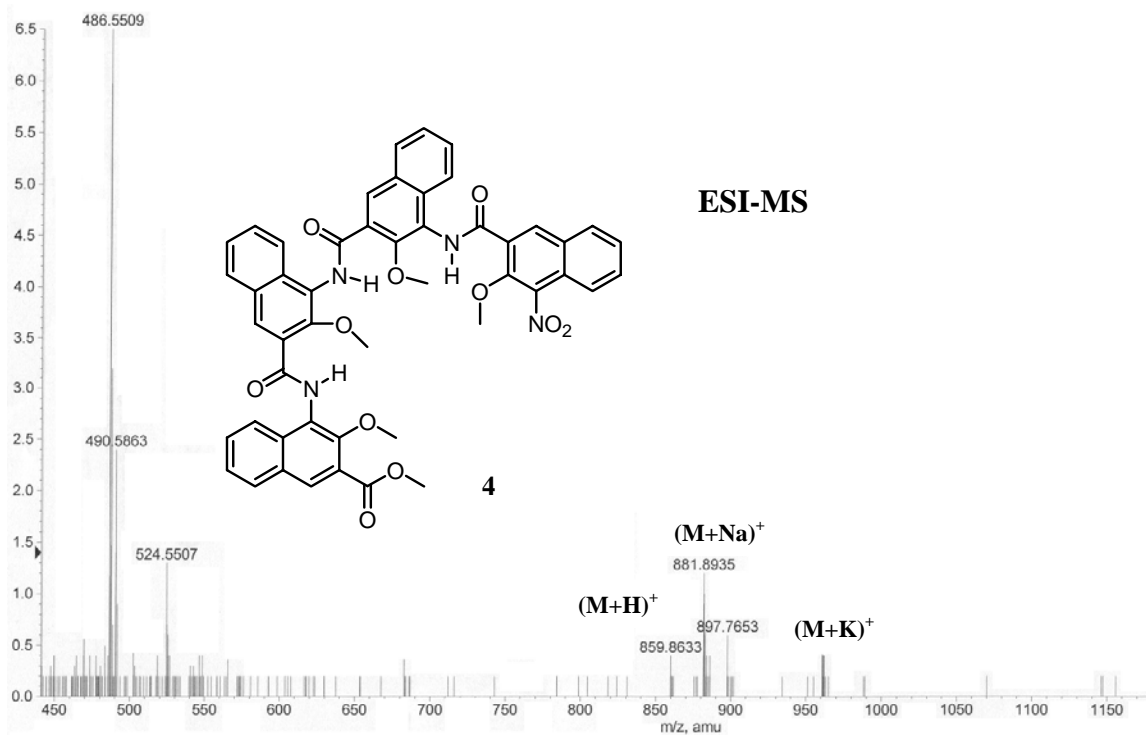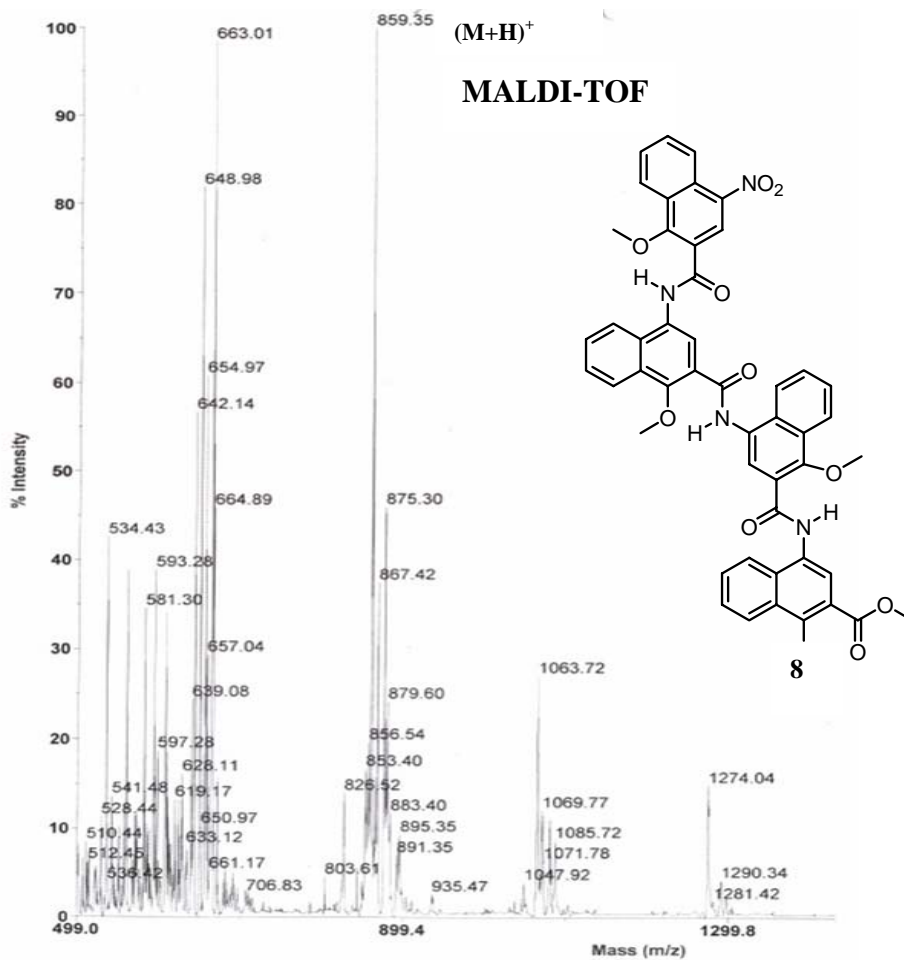

\\\_PPY-NAP14A-CHCA\_0001.dat  
Acquired: 14:34:00, September 17, 2007

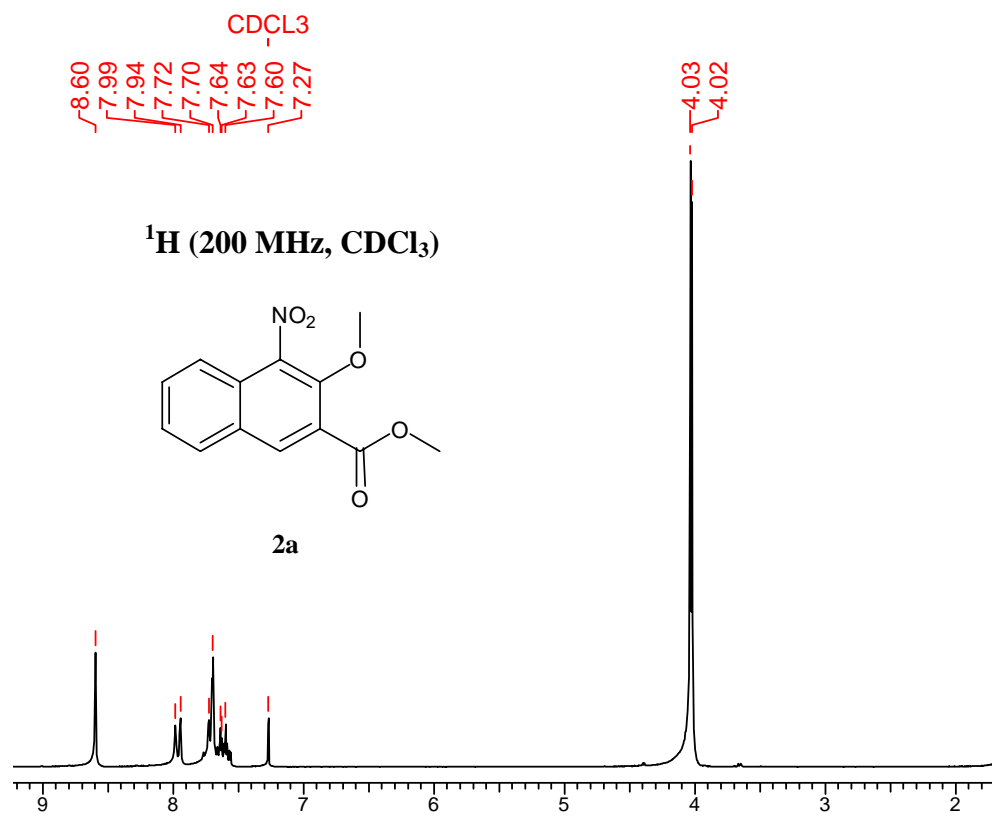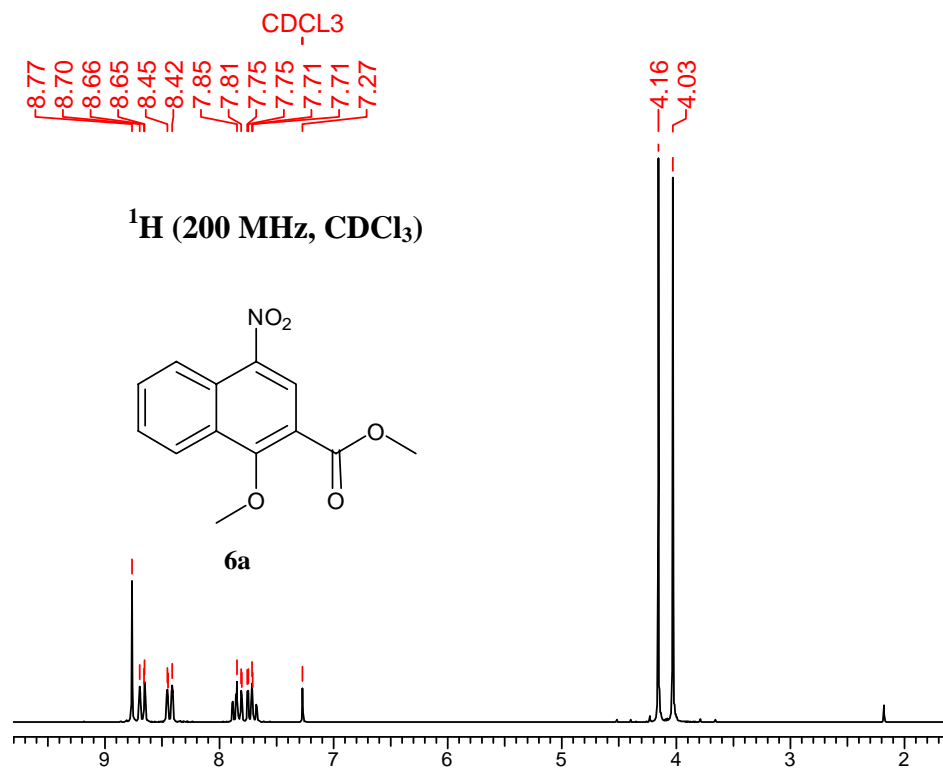

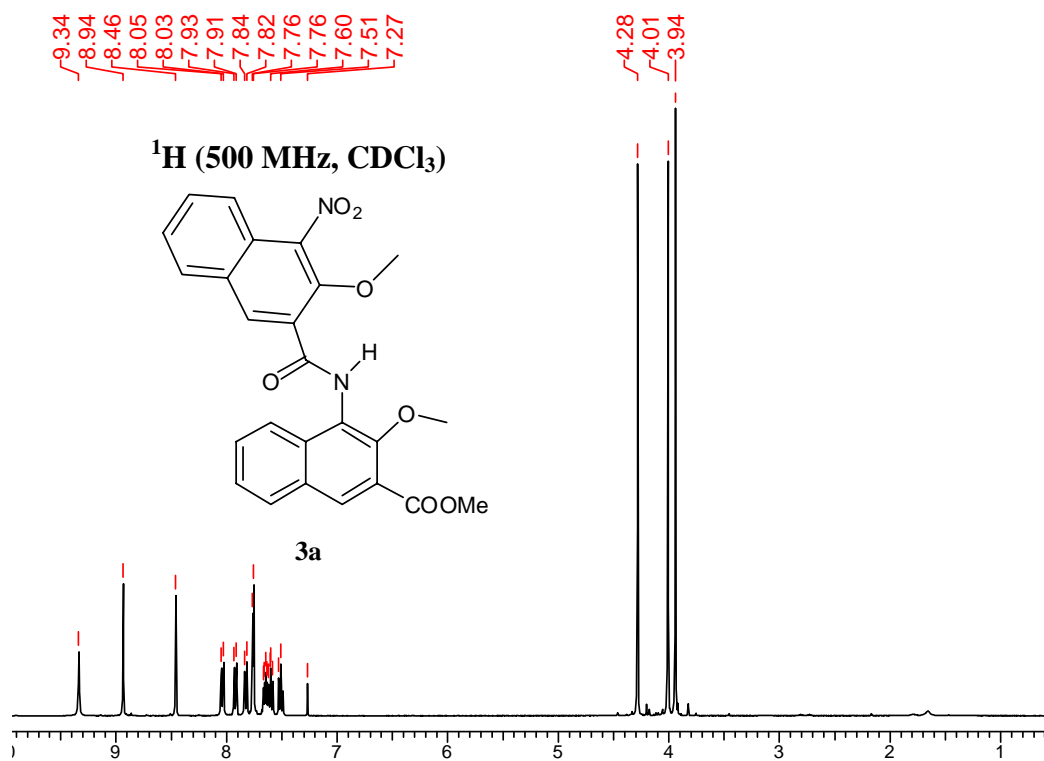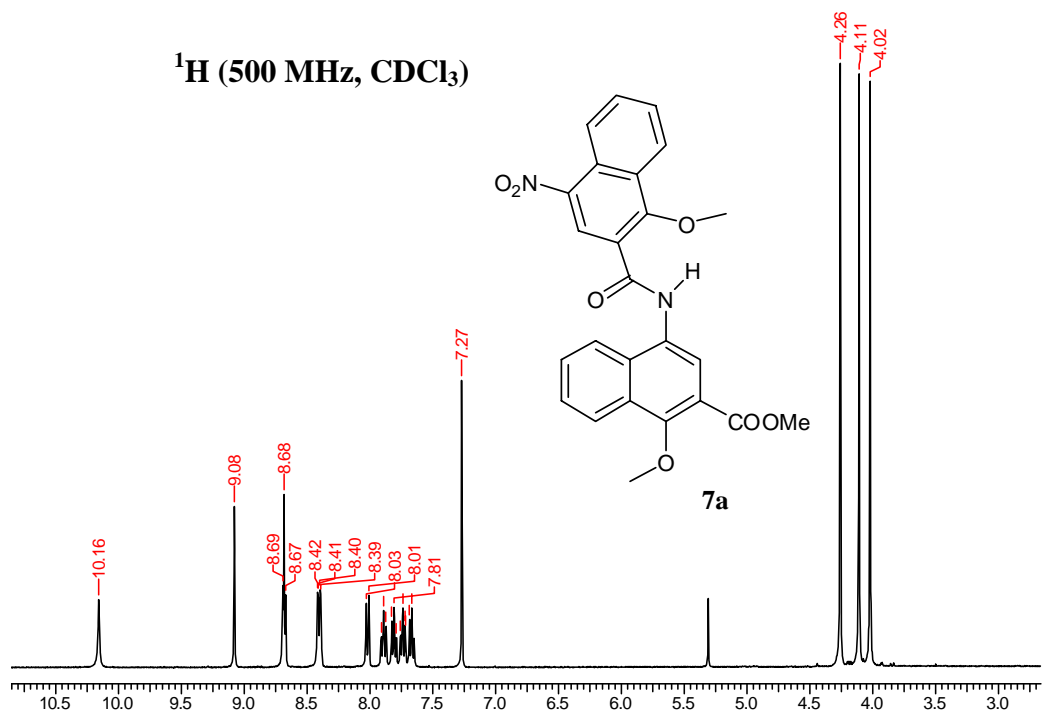

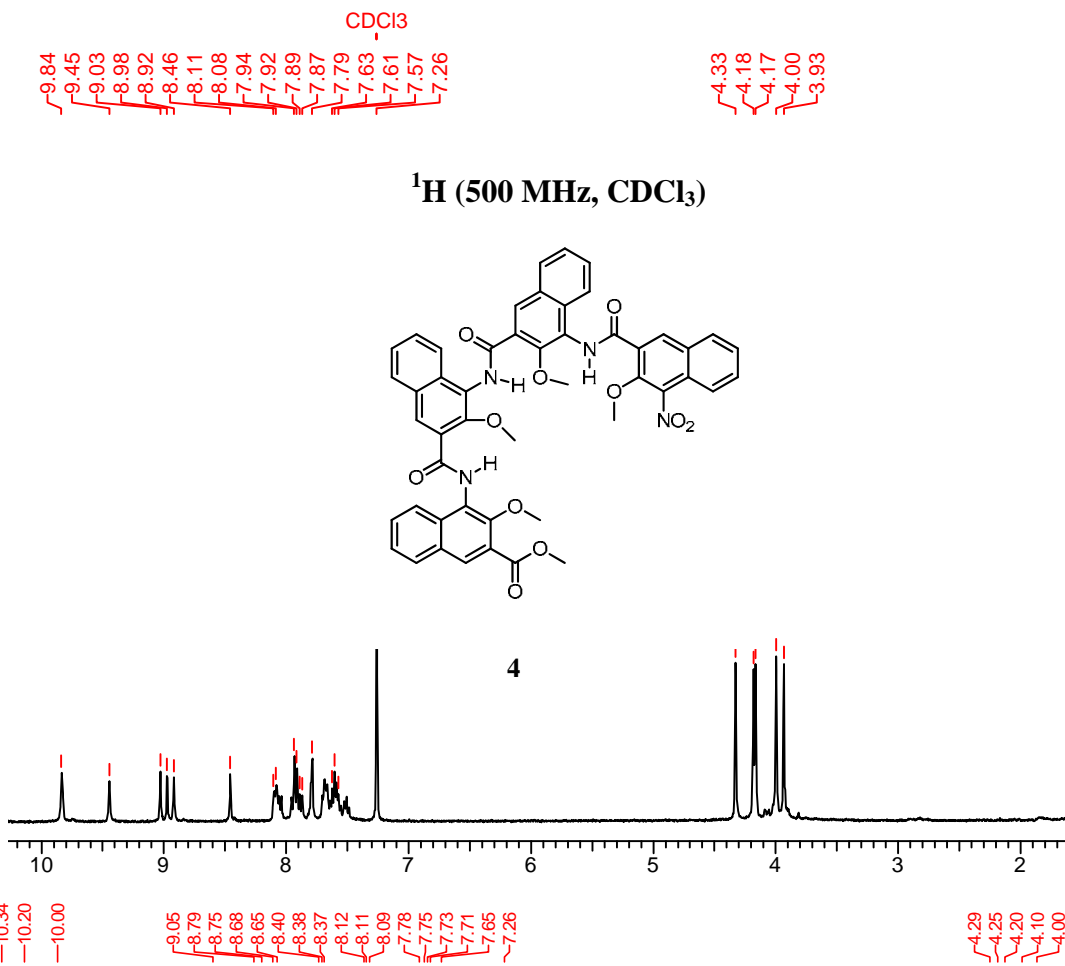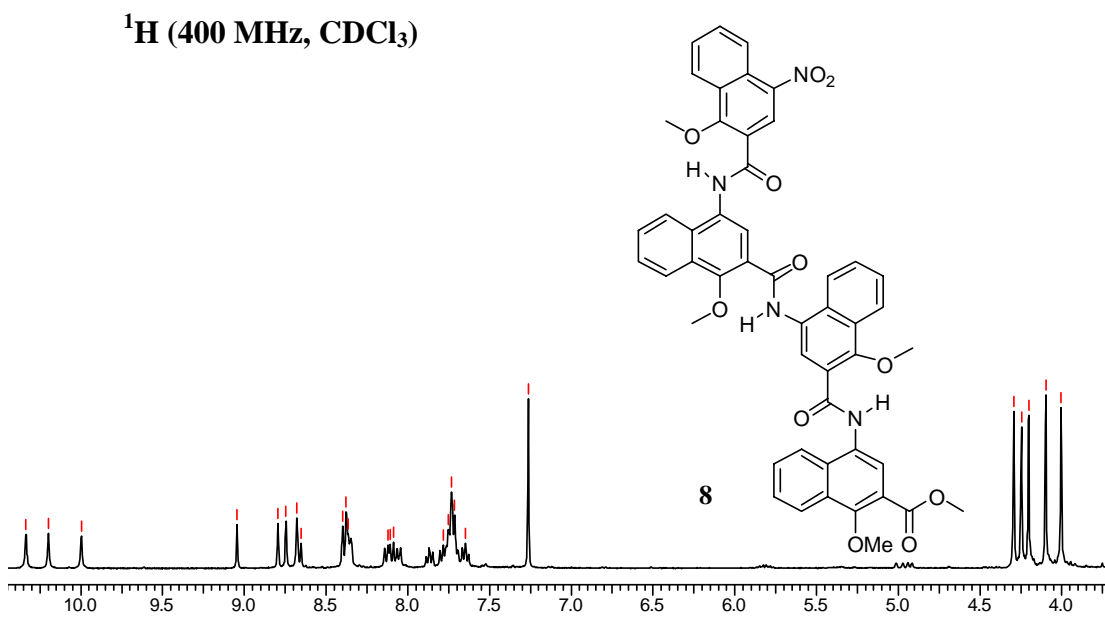



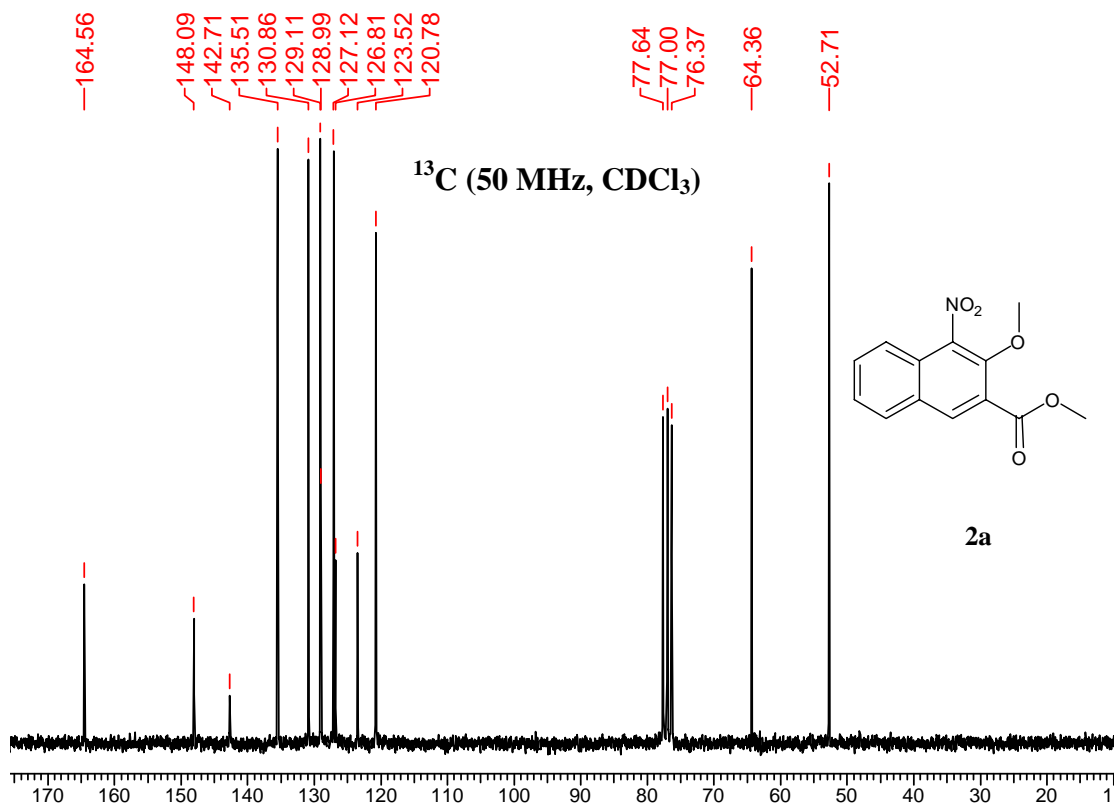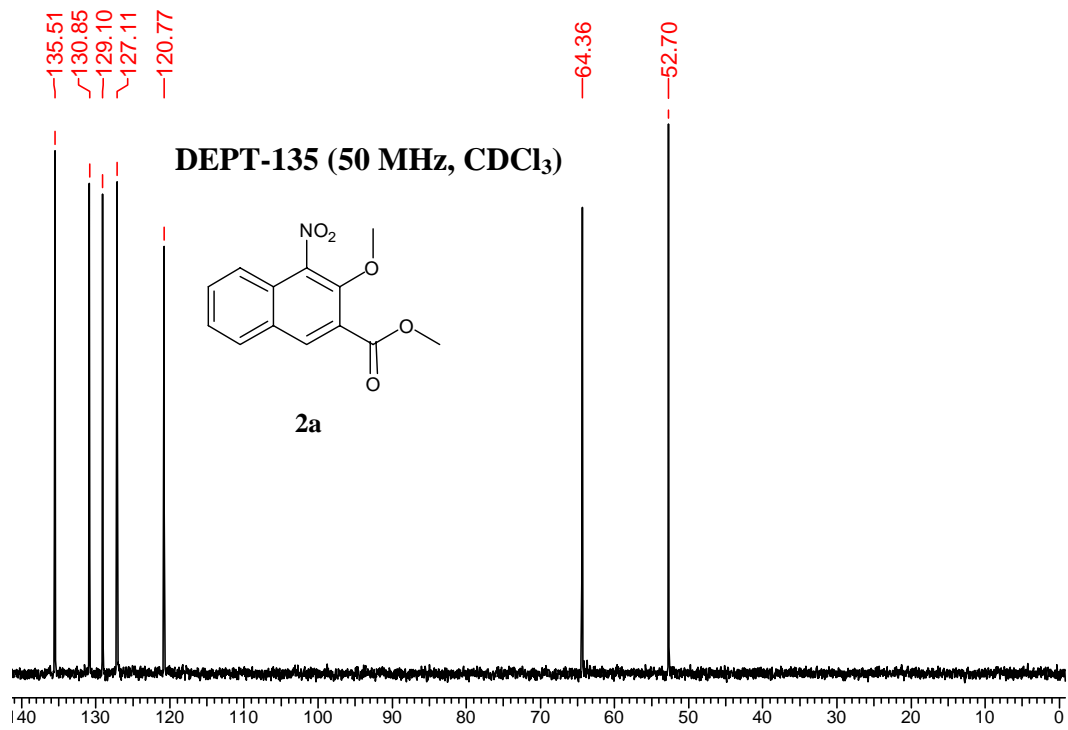

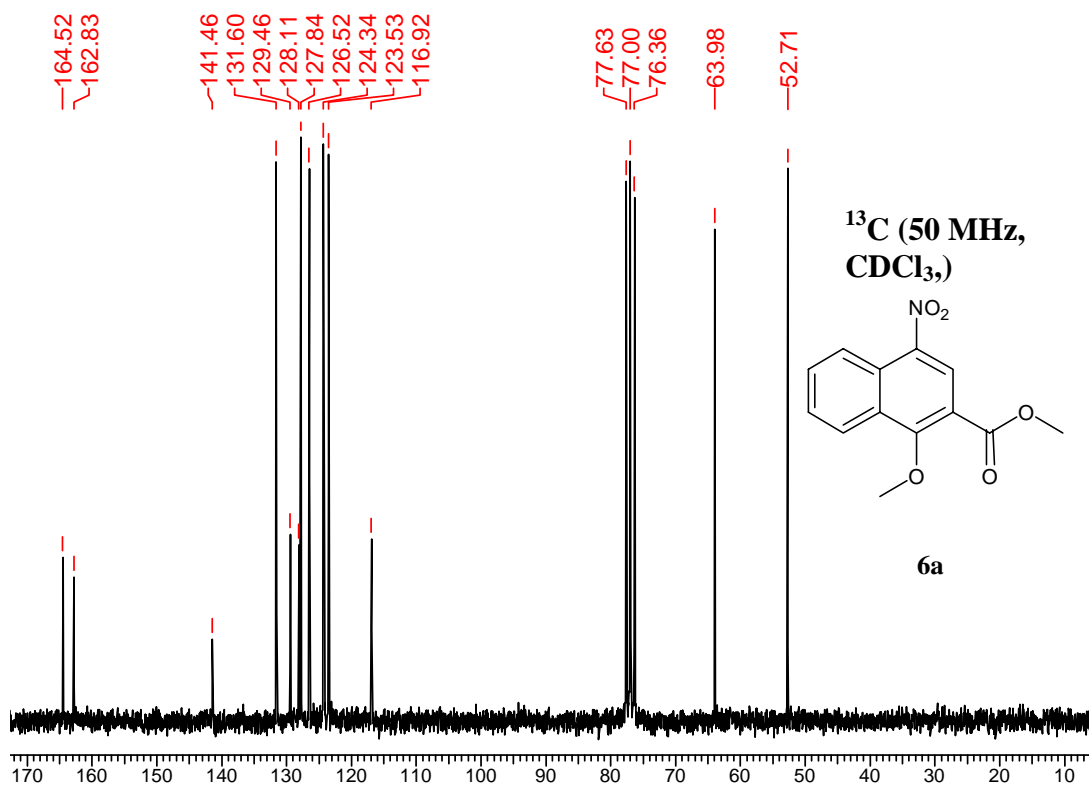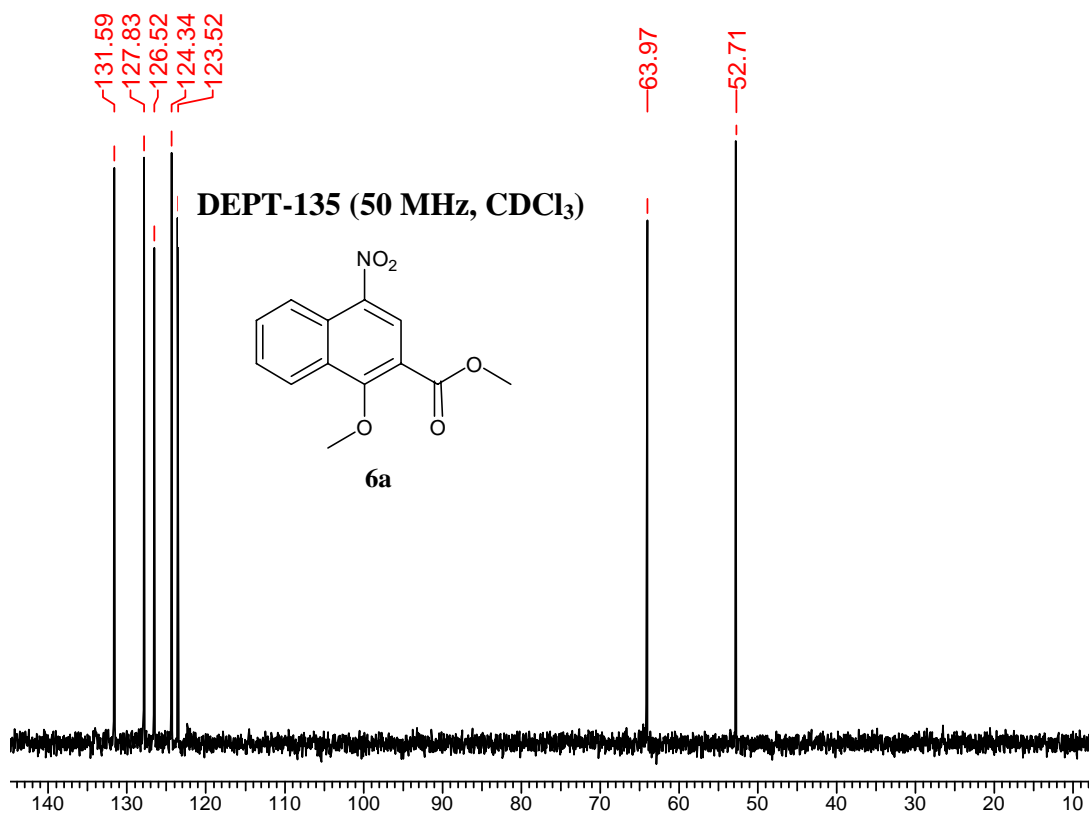

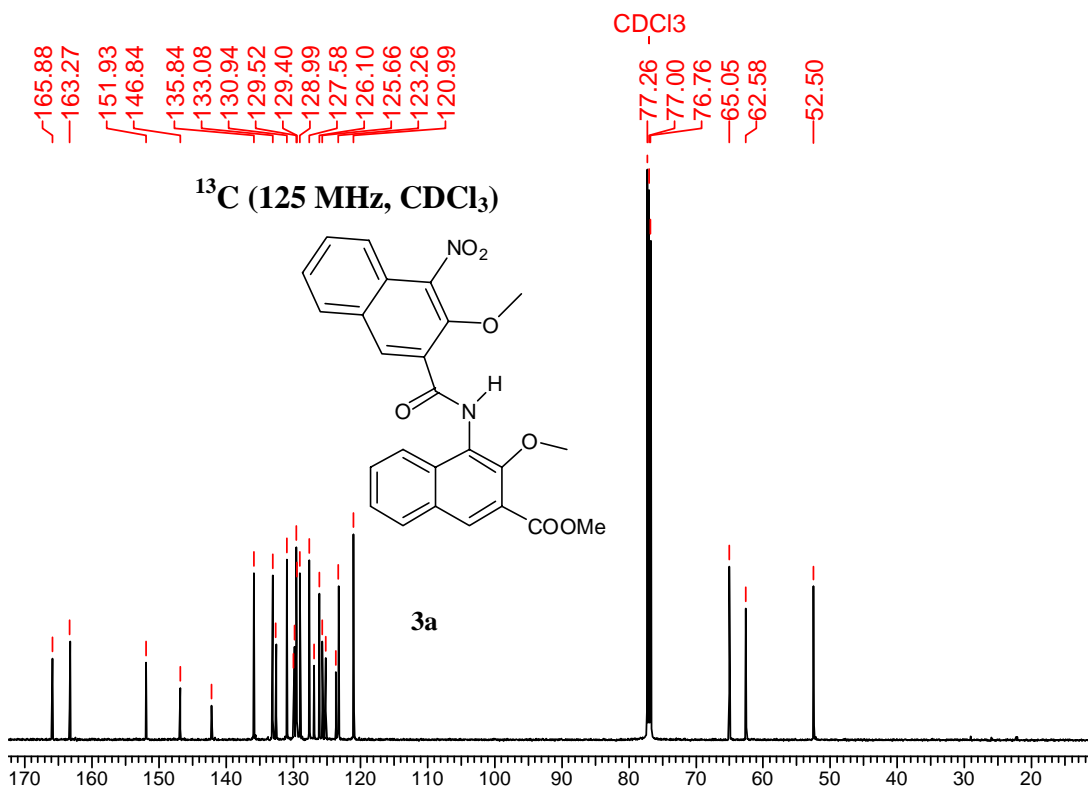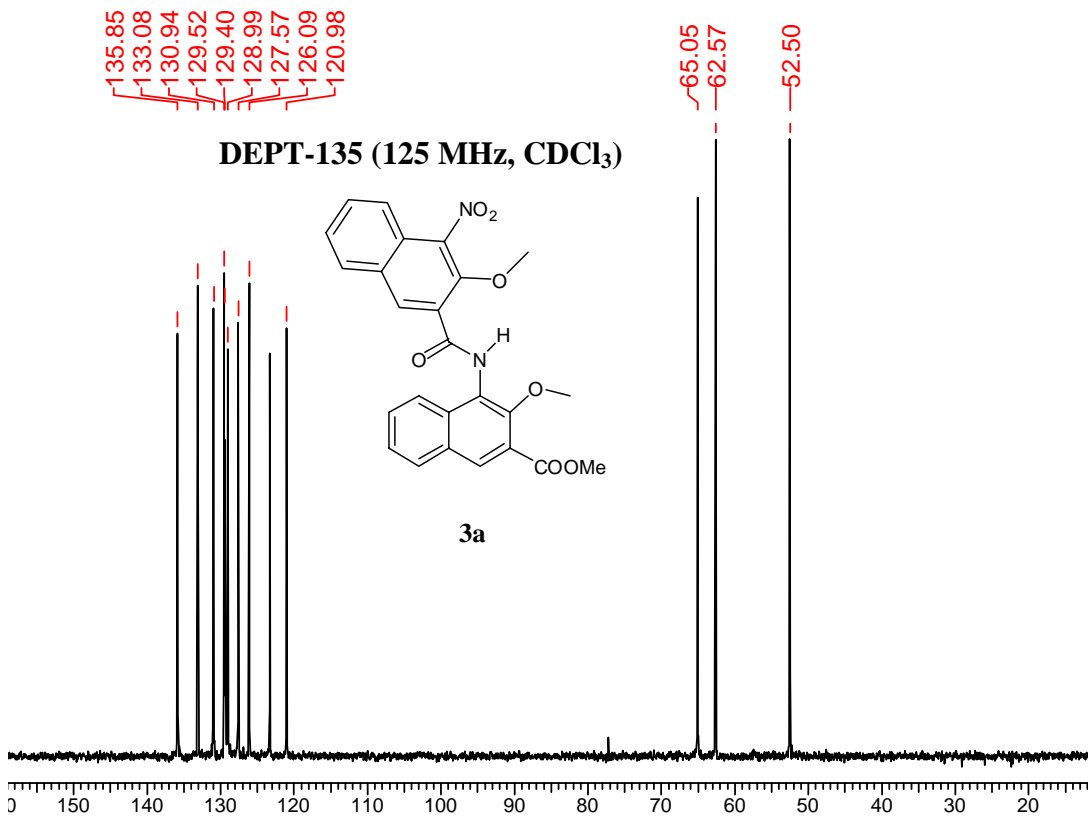

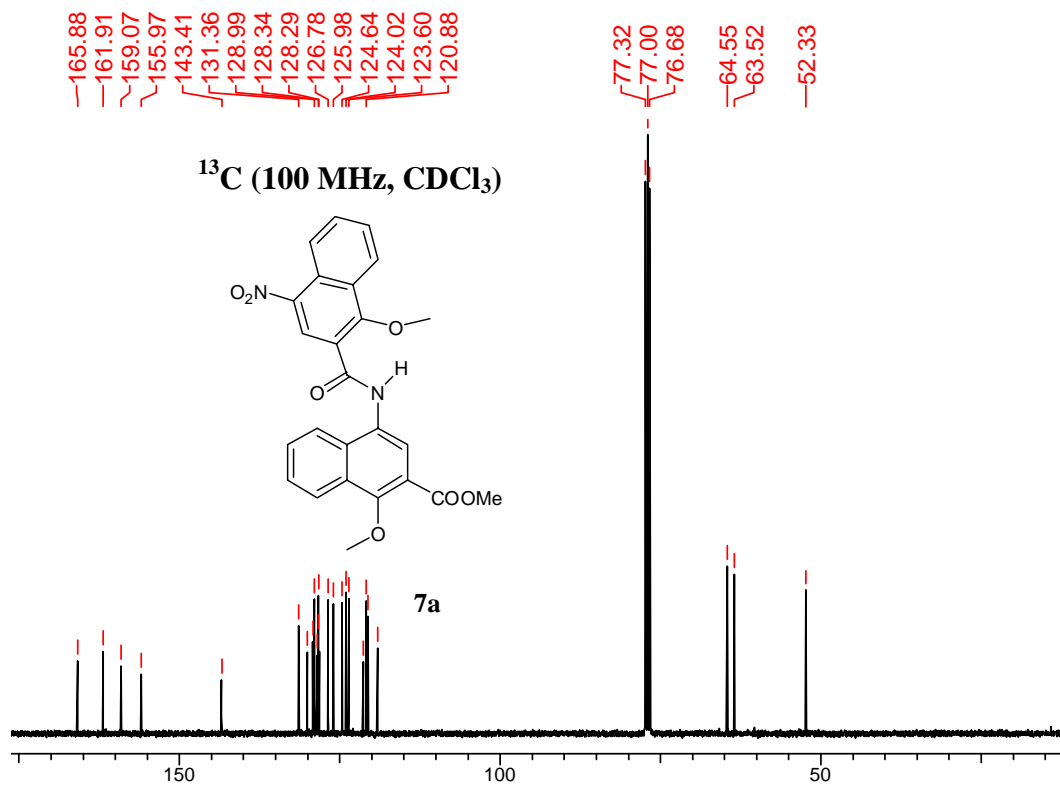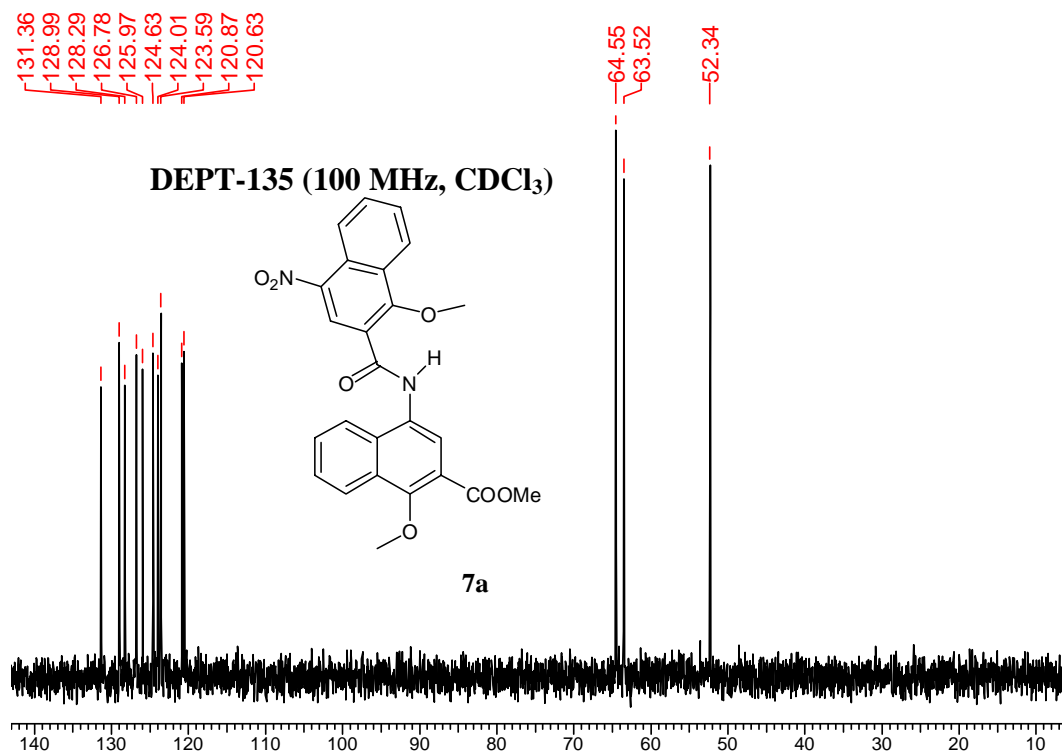

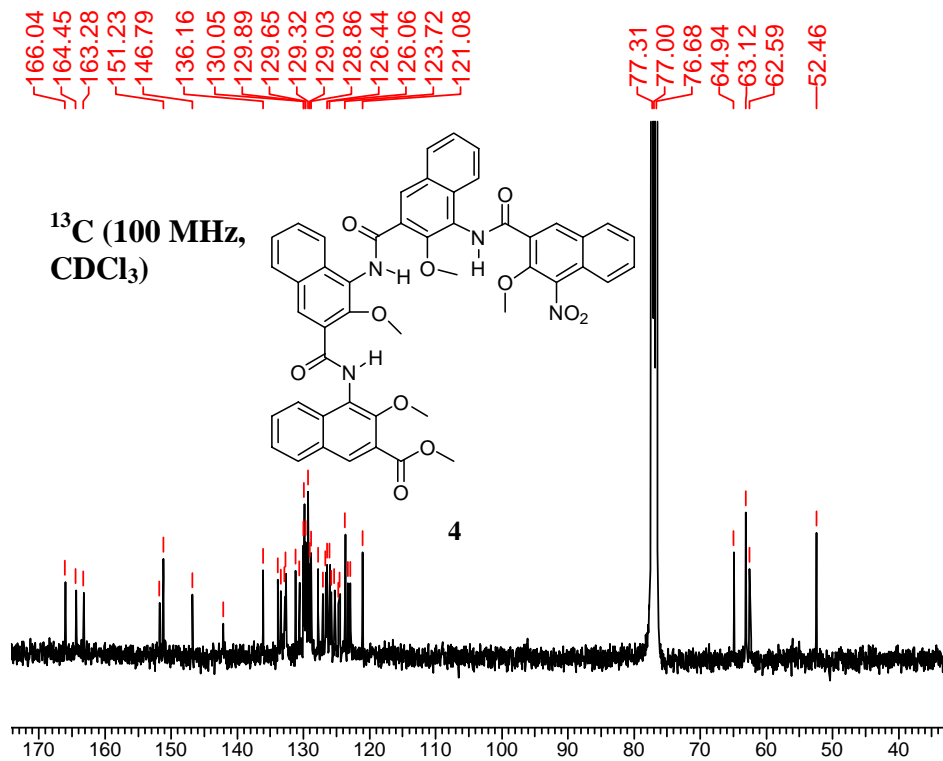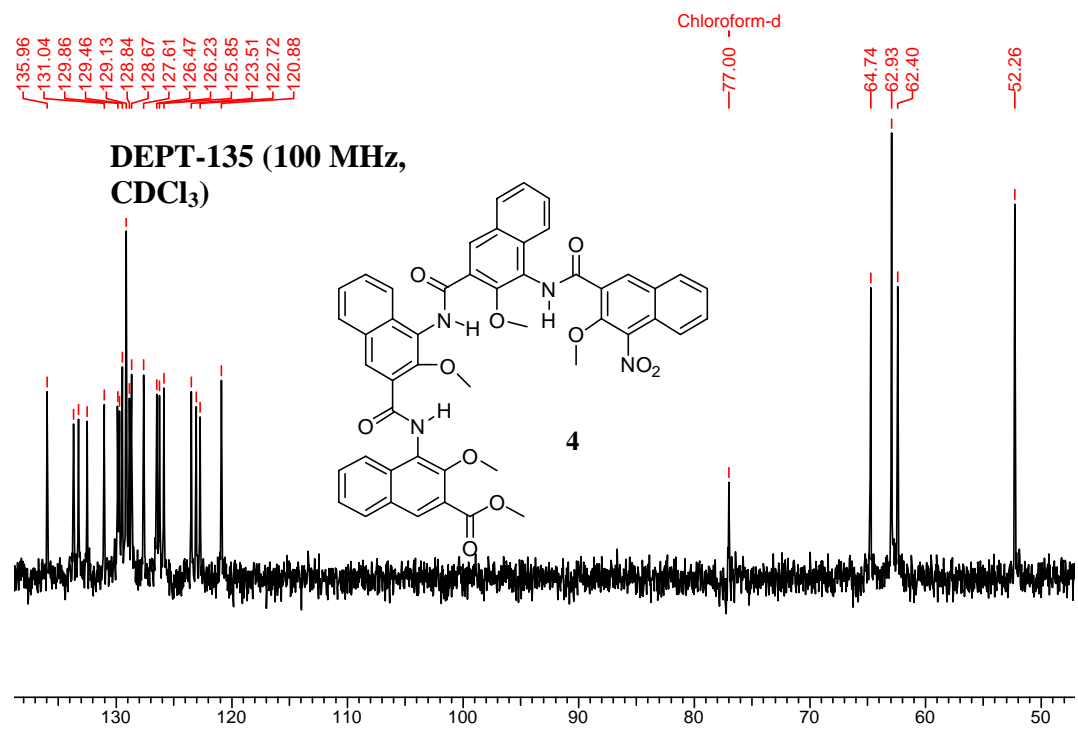

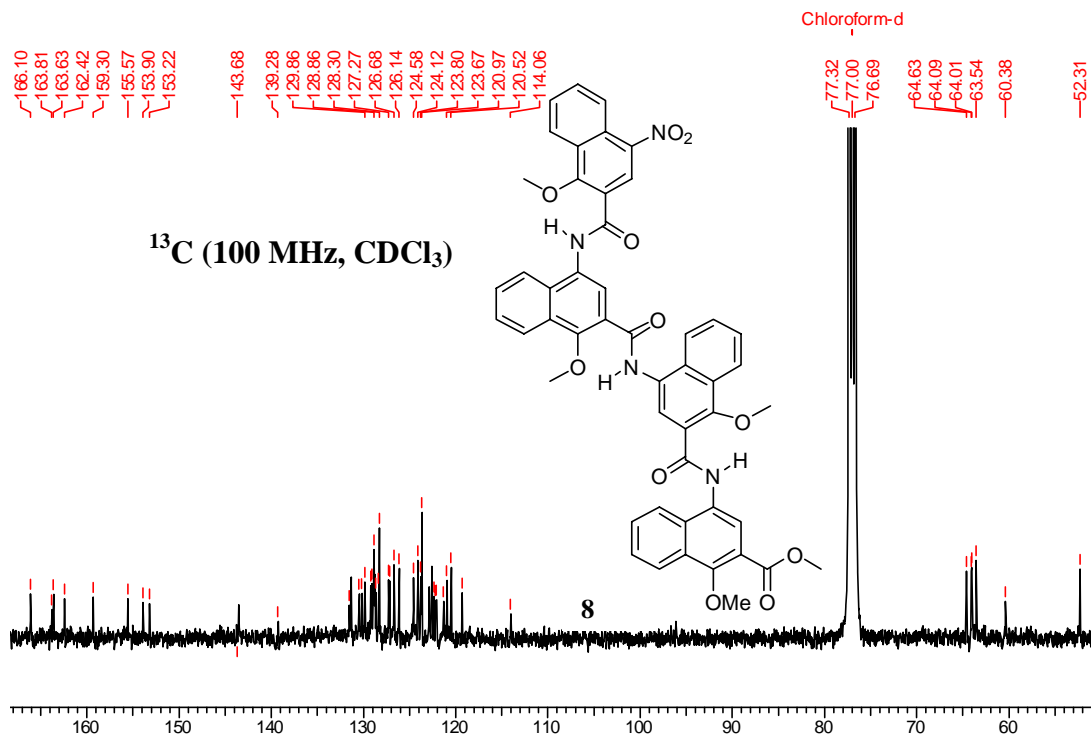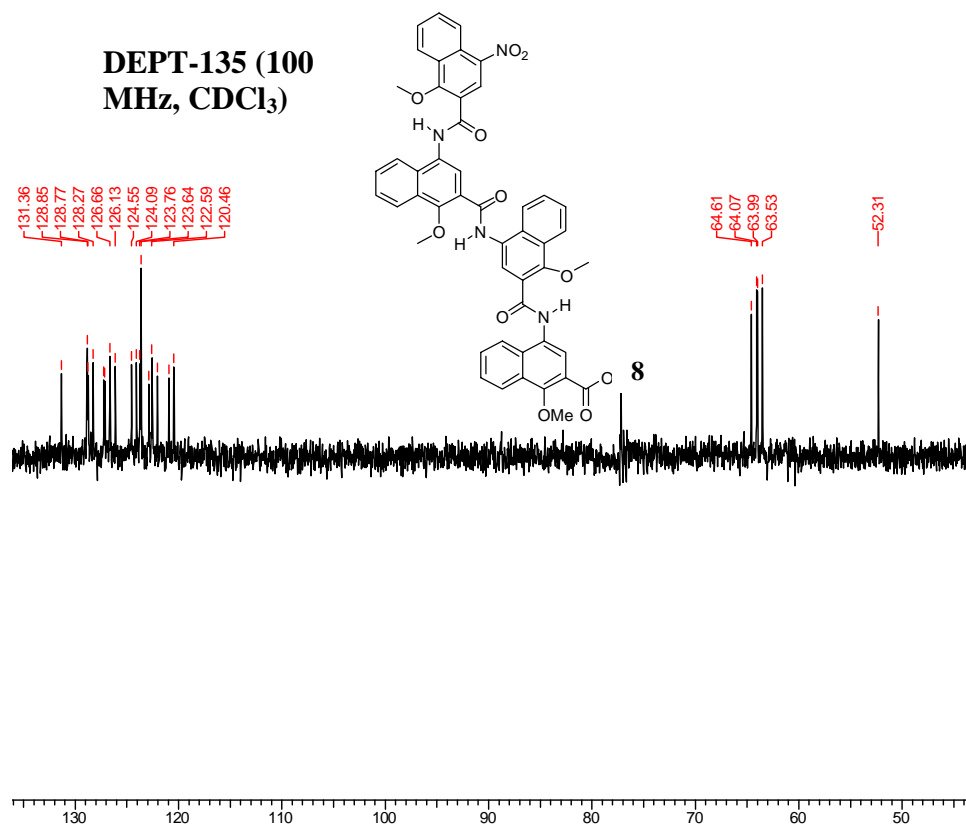

**Table S1.** Dilution study of **3a** (400 MHz, CDCl<sub>3</sub>)

| No | Concentration<br>(in mmol) | $\delta_{\text{NH}}$ |
|----|----------------------------|----------------------|
| 1  | 120                        | 9.34                 |
| 2  | 100                        | 9.34                 |
| 3  | 80                         | 9.34                 |
| 4  | 60                         | 9.34                 |
| 5  | 40                         | 9.34                 |
| 6  | 20                         | 9.34                 |
| 7  | 10                         | 9.35                 |
| 8  | 5                          | 9.35                 |
| 9  | 4                          | 9.35                 |
| 10 | 2                          | 9.35                 |

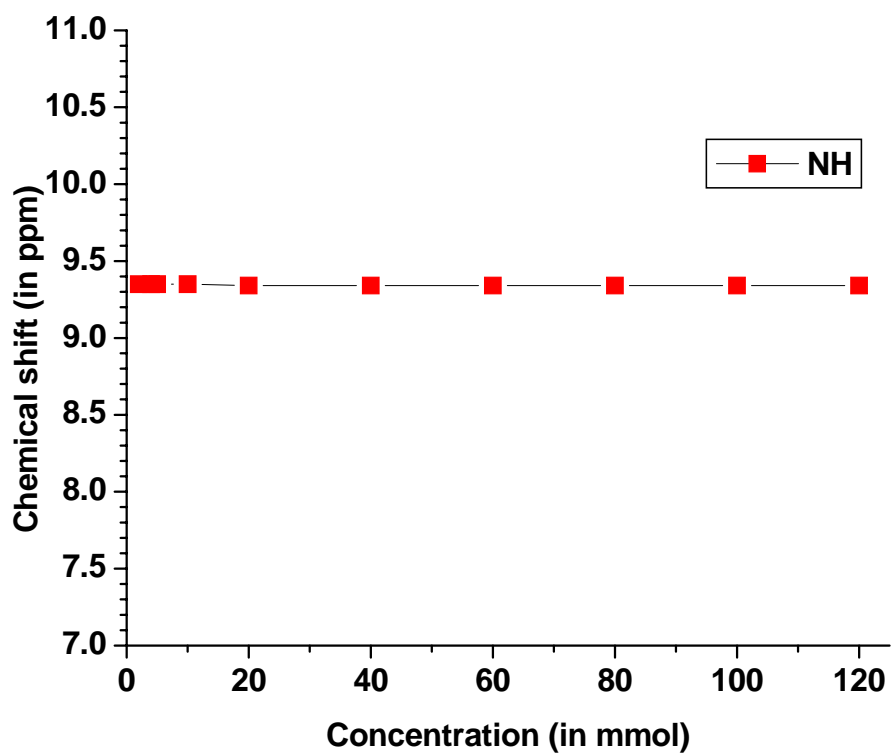

**Figure S1.** Dilution plot for **3a** (400 MHz, CDCl<sub>3</sub>)

**Table S2.** Titration study of **3a** in  $\text{CDCl}_3$  ( $V_{\text{DMSO-d6 added}} = 0\text{-}50 \mu\text{lit}$ )

| No | $V_{\text{DMSO-d6}}$<br>(in $\mu\text{L}$ ) | $\delta_{\text{NH}}$ |
|----|---------------------------------------------|----------------------|
| 1  | 0                                           | 9.34                 |
| 2  | 5                                           | 9.26                 |
| 3  | 10                                          | 9.31                 |
| 4  | 15                                          | 9.33                 |
| 5  | 20                                          | 9.35                 |
| 6  | 25                                          | 9.37                 |
| 7  | 30                                          | 9.41                 |
| 8  | 35                                          | 9.44                 |
| 9  | 40                                          | 9.47                 |
| 10 | 45                                          | 9.48                 |
| 11 | 50                                          | 9.50                 |

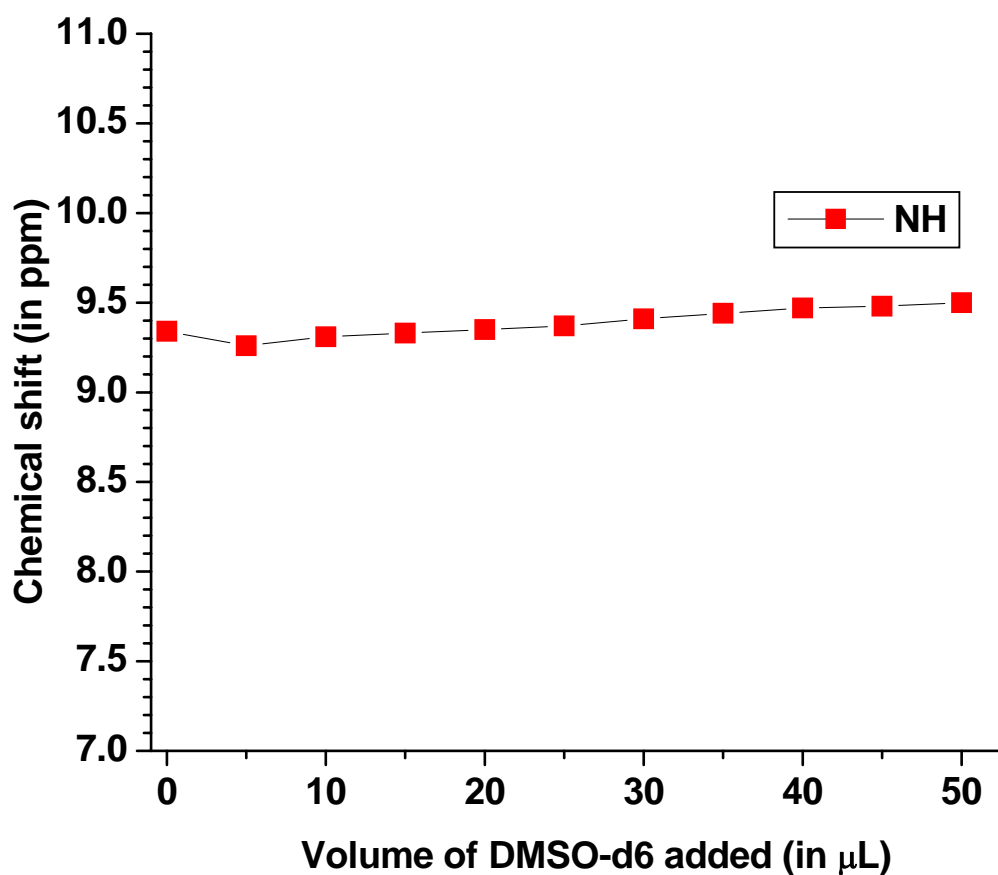

**Figure S2.** Titration plot for **3a** in  $\text{CDCl}_3$  (400 MHz)



**Table S3.** Dilution study of **7a** (400 MHz, CDCl<sub>3</sub>)

| No | Concentration<br>(in mmol) | $\delta_{\text{NH}}$ |
|----|----------------------------|----------------------|
| 1  | 120                        | 10.14                |
| 2  | 100                        | 10.14                |
| 3  | 80                         | 10.15                |
| 4  | 60                         | 10.15                |
| 5  | 40                         | 10.15                |
| 6  | 20                         | 10.15                |
| 7  | 10                         | 10.15                |
| 8  | 5                          | 10.16                |
| 9  | 4                          | 10.16                |
| 10 | 2                          | 10.16                |

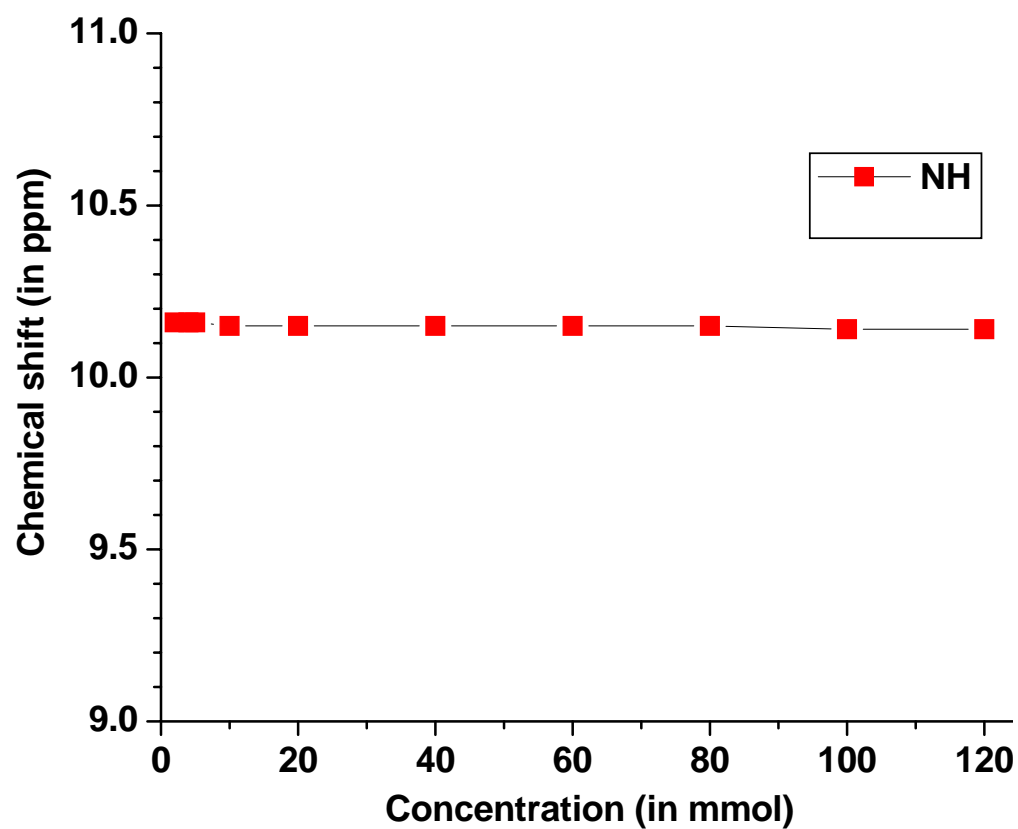

**Figure S3.** Dilution plot for **7a** (CDCl<sub>3</sub>, 400 MHz)

**Table S4.** Titration study of **7a** in  $\text{CDCl}_3$  (400 MHz)

| No | $V_{\text{DMSO-d6}}$<br>(in $\mu\text{L}$ ) | $\delta_{\text{NH}}$ |
|----|---------------------------------------------|----------------------|
| 1  | 0                                           | 10.16                |
| 2  | 5                                           | 10.08                |
| 3  | 10                                          | 10.10                |
| 4  | 15                                          | 10.13                |
| 5  | 20                                          | 10.14                |
| 6  | 25                                          | 10.15                |
| 7  | 30                                          | 10.17                |
| 8  | 35                                          | 10.18                |
| 9  | 40                                          | 10.19                |
| 10 | 45                                          | 10.21                |
| 11 | 50                                          | 10.23                |

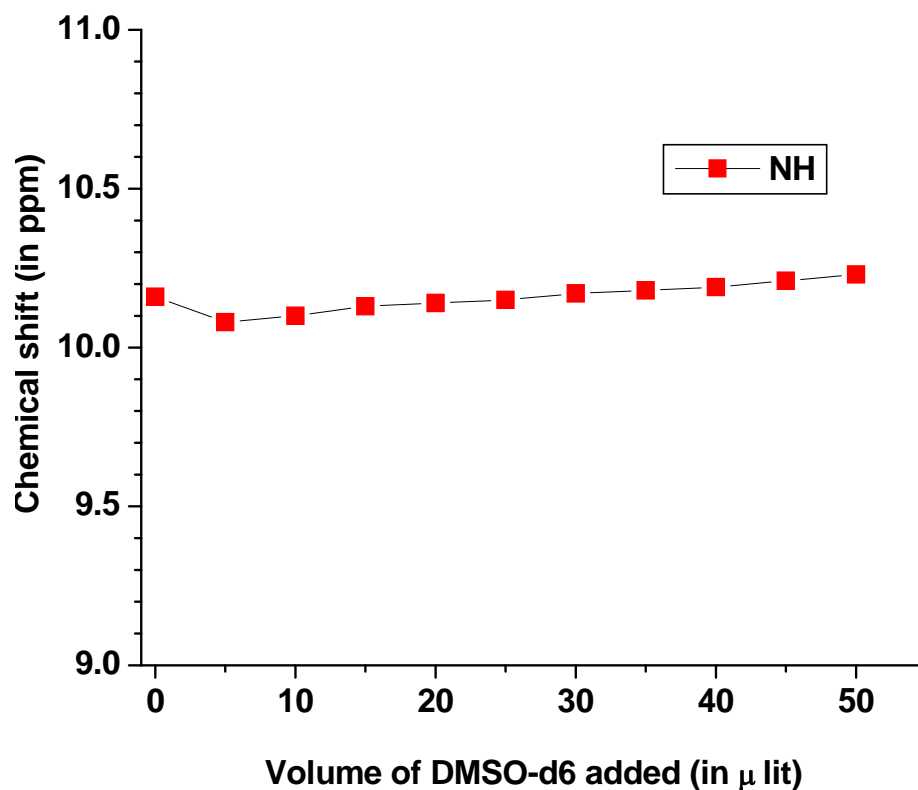

**Figure S4.** Titration plot for **7a** ( $\text{CDCl}_3$ , 400 MHz)

**Table S5.** Titration study of **4** in  $\text{CDCl}_3$  ( $V_{\text{DMSO-d}_6 \text{ added}} = 0\text{-}50 \mu\text{lit}$ )

| $V_{\text{DMSO-d}_6}$<br>(in $\mu\text{l}$ ) | Chemical shifts in ppm  |                         |                       |
|----------------------------------------------|-------------------------|-------------------------|-----------------------|
|                                              | $\delta_{\text{NH1}}^*$ | $\delta_{\text{NH2}}^*$ | $\delta_{\text{NH3}}$ |
| 0                                            | 9.84                    | 9.83                    | 9.45                  |
| 5                                            | 9.84                    | 9.84                    | 9.46                  |
| 10                                           | 9.84                    | 9.84                    | 9.47                  |
| 15                                           | 9.85                    | 9.85                    | 9.50                  |
| 20                                           | 9.86                    | 9.86                    | 9.51                  |
| 25                                           | 9.89                    | 9.86                    | 9.60                  |
| 30                                           | 9.94                    | 9.88                    | 9.71                  |
| 35                                           | 9.94                    | 9.88                    | 9.73                  |
| 40                                           | 9.97                    | 9.90                    | 9.78                  |
| 45                                           | 9.98                    | 9.90                    | 9.79                  |
| 50                                           | 9.98                    | 9.90                    | 9.79                  |

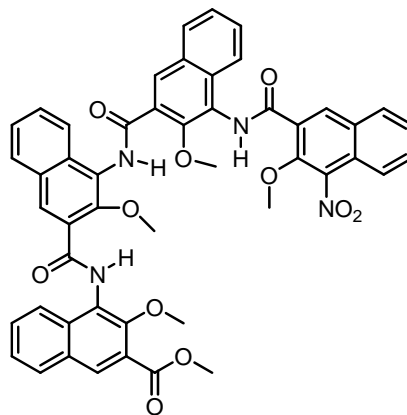

\*NHs could not be dispersed

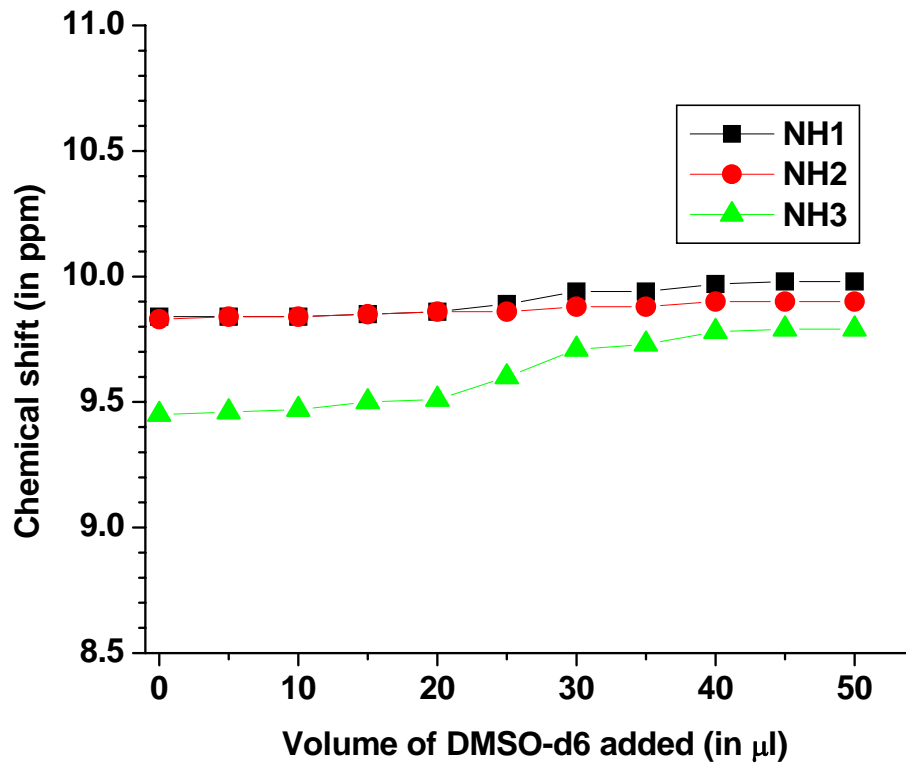

**Figure S5.** Titration plot for **4** in  $\text{CDCl}_3$  (400 MHz)

**Table S6.** Titration study of **8** in  $\text{CDCl}_3$  ( $V_{\text{DMSO-d}_6 \text{ added}} = 0\text{-}50 \mu\text{lit}$ )

| $V_{\text{DMSO-d}_6}$<br>(in $\mu\text{l}$ ) | Chemical shifts in ppm |                       |                       |
|----------------------------------------------|------------------------|-----------------------|-----------------------|
|                                              | $\delta_{\text{NH1}}$  | $\delta_{\text{NH2}}$ | $\delta_{\text{NH3}}$ |
| 0                                            | 10.34                  | 10.20                 | 10.0                  |
| 5                                            | 10.34                  | 10.20                 | 10.0                  |
| 10                                           | 10.34                  | 10.20                 | 10.0                  |
| 15                                           | 10.34                  | 10.21                 | 10.02                 |
| 20                                           | 10.37                  | 10.27                 | 10.12                 |
| 25                                           | 10.38                  | 10.28                 | 10.14                 |
| 30                                           | 10.39                  | 10.30                 | 10.16                 |
| 35                                           | 10.40                  | 10.31                 | 10.19                 |
| 40                                           | 10.40                  | 10.32                 | 10.20                 |
| 45                                           | 10.41                  | 10.34                 | 10.23                 |
| 50                                           | 10.42                  | 10.35                 | 10.24                 |

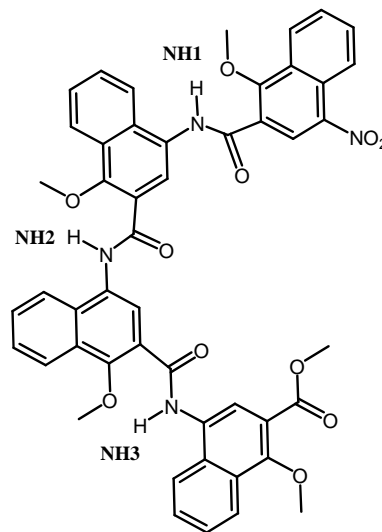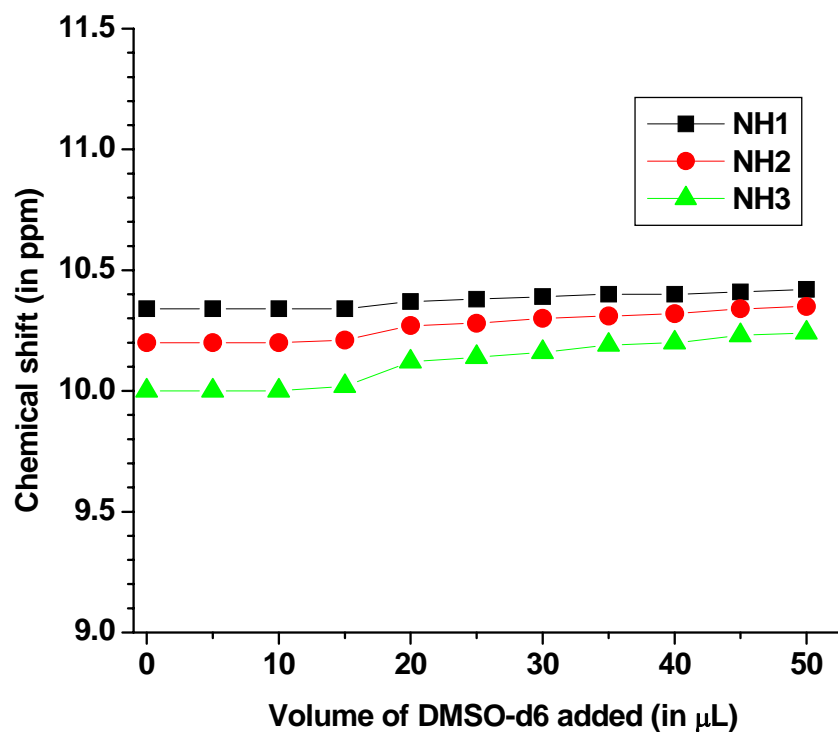

**Figure S6.** Titration plot for **8** in  $\text{CDCl}_3$  (400 MHz)

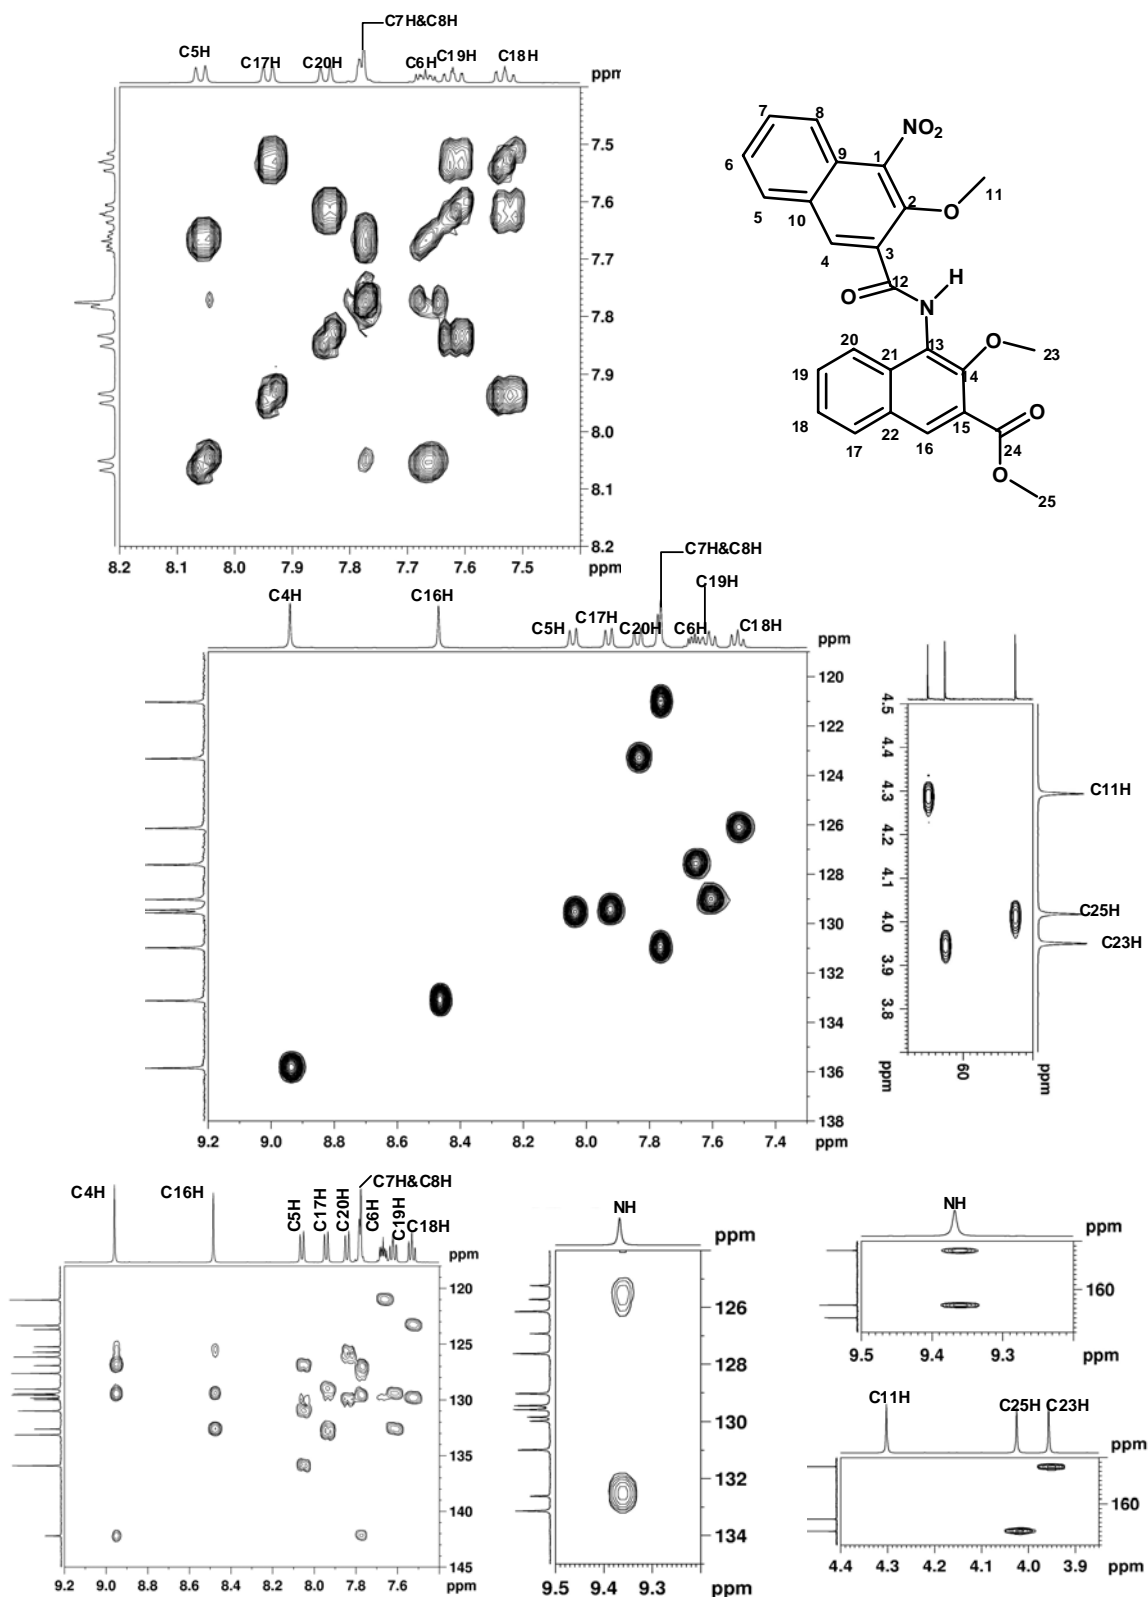

**Figure S7.** Partial 2D COSY, HSQC and HMBC spectra of **3a** (400 MHz, CDCl<sub>3</sub>).

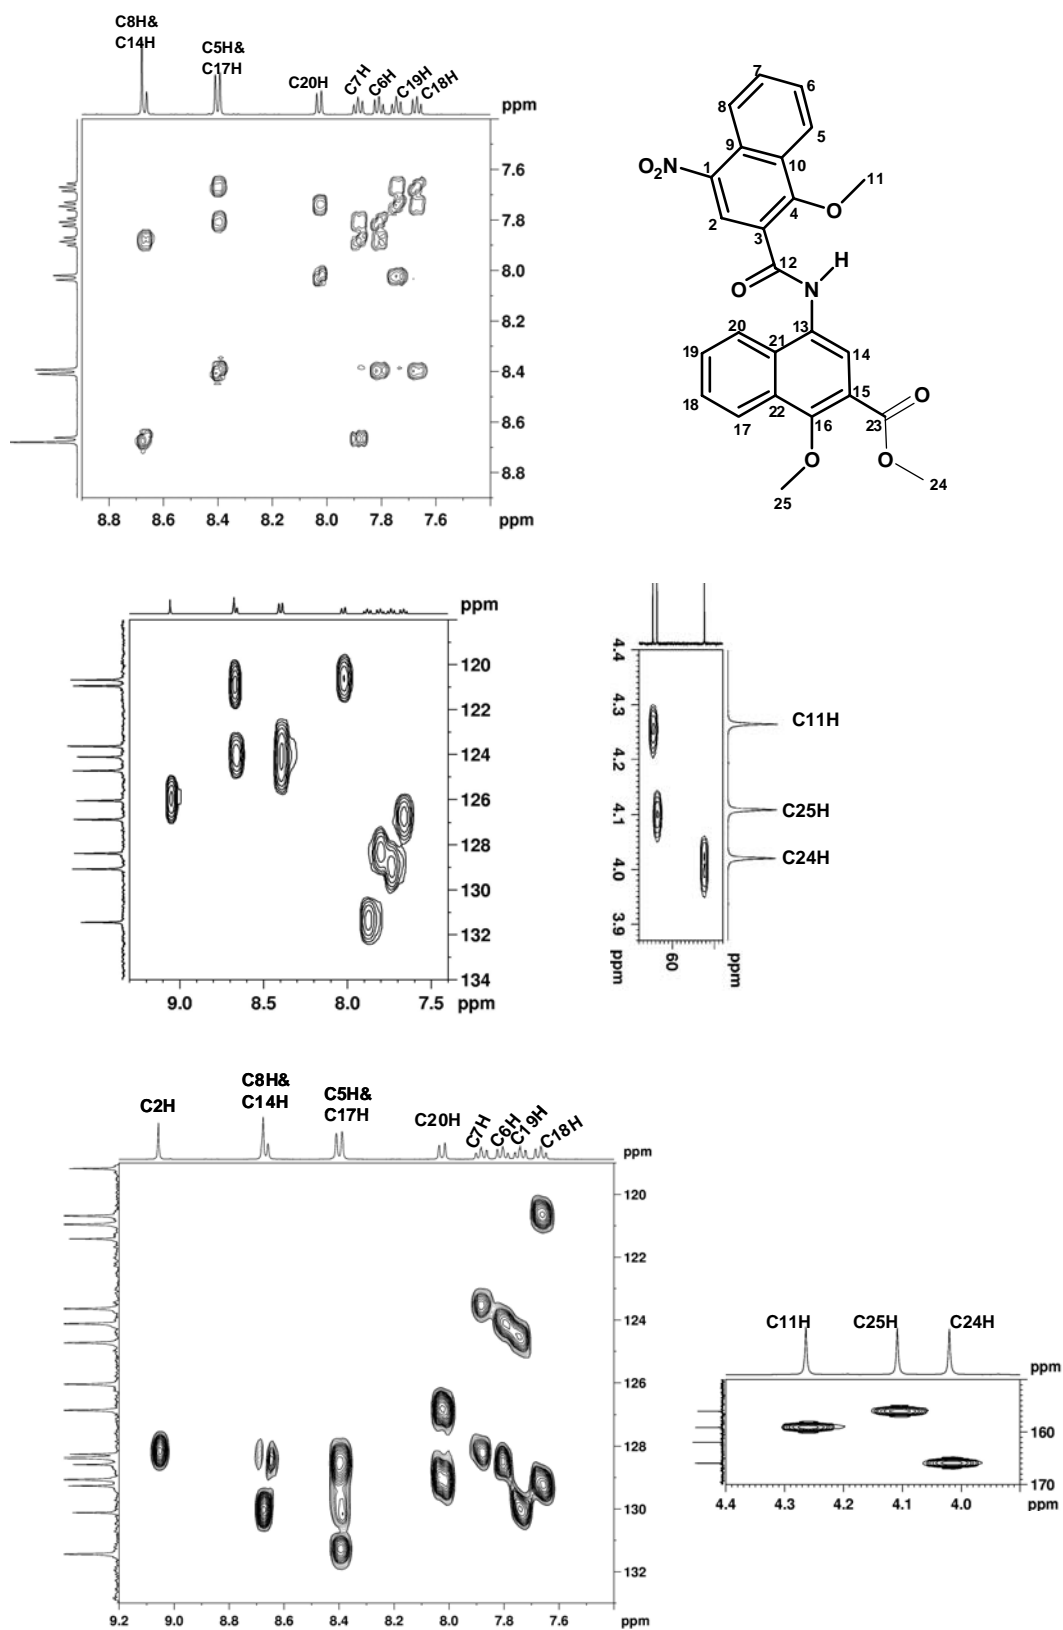

**Figure S8.** Partial 2D COSY, HSQC and HMBC spectra of **7a** (400 MHz, CDCl<sub>3</sub>).

**Table 7.**  
<sup>1</sup>H, <sup>13</sup>C HSQC assignments for **3a**

| <sup>1</sup> H (δ/ppm) | <sup>13</sup> C (δ/ppm) |        |
|------------------------|-------------------------|--------|
| 8.95 (C4H)             | 135.62                  |        |
| 8.48 (C16H)            | 132.86                  |        |
| 8.06 (C5H)             | 129.36                  |        |
| 7.94 (C17H)            | 129.70                  |        |
| 7.84 (C20H)            | 127.35                  |        |
| 7.77 (2H)              | C7H                     | 123.04 |
|                        | C8H                     | 120.76 |
| 7.67 (C6H)             | 130.72                  |        |
| 7.62 (C19H)            | 128.76                  |        |
| 7.52 (C18H)            | 125.87                  |        |
| 4.30 (3H, C11H)        | 64.83                   |        |
| 4.02 (3H, C25H)        | 52.27                   |        |
| 3.95 (3H, C23H)        | 62.37                   |        |

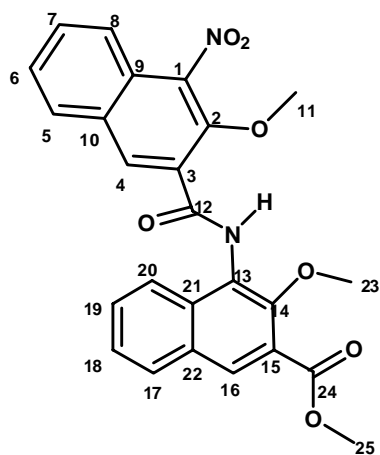

**Table 8.**  
<sup>1</sup>H, <sup>13</sup>C HMBC assignments for **3a**

| <sup>1</sup> H (δ/ppm) | <sup>13</sup> C (δ/ppm)        |
|------------------------|--------------------------------|
| 9.36 (NH)              | 163.03, 151.69, 132.32, 124.94 |
| 8.95 (C4H)             | 163.03, 146.61, 126.65, 124.94 |
| 8.48 (C16H)            | 165.64, 151.69, 132.32         |
| 8.06 (C5H)             | 126.65, 130.72, 141.91         |
| 7.94 (C17H)            | 132.32, 132.86, 128.76         |
| 7.84 (C20H)            | 129.70, 125.43, 125.87         |
| 7.67 (C6H)             | 132.32,                        |
| 7.62 (C19H)            | 132.32, 129.17                 |
| 7.52 (C18H)            | 129.70, 123.04,                |
| 4.30 (3H, C11H)        | 146.61                         |
| 4.02 (3H, C25H)        | 165.64                         |
| 3.95 (3H, C23H)        | 151.69                         |

**Table 9.**  
<sup>1</sup>H, <sup>13</sup>C HSQC assignments for **7a**

| <sup>1</sup> H (/ppm) |             | <sup>13</sup> C (/ppm) |
|-----------------------|-------------|------------------------|
| 9.02 (C2H)            |             | 125.98                 |
| 8.65 (C14H)           |             | 120.88                 |
| 8.64 (C8H)            |             | 124.02                 |
| 8.37                  | C5H<br>C17H | 128.28, 126.78         |
| 8.01 (C20H)           |             | 120.64                 |
| 7.85 (C7H)            |             | 131.36                 |
| 7.78 (C6H)            |             | 128.99                 |
| 7.72 (C19H)           |             | 120.64                 |
| 7.64 (C18H)           |             | 126.78                 |
| 4.24 (3H, C11H)       |             | 64.55                  |
| 4.08 (3H, C25H)       |             | 63.52                  |
| 4.00 (3H, C24H)       |             | 62.33                  |

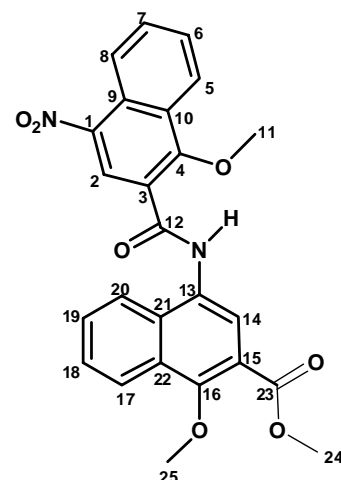

**Table 10.**  
<sup>1</sup>H, <sup>13</sup>C HMBC assignments for **7a**

| <sup>1</sup> H (/ppm) |             | <sup>13</sup> C (/ppm)                           |
|-----------------------|-------------|--------------------------------------------------|
| 10.14 (NH)            |             | 161.91, 130.06, 120.88                           |
| 9.02 (C2H)            |             | 161.91, 159.07, 128.17                           |
| 8.65 (C14H)           |             | 165.88, 155.97, 130.06                           |
| 8.64 (C8H)            |             | 121.35, 128.29, 128.34                           |
| 8.37                  | C5H<br>C17H | 159.07, 131.36, 128.17<br>155.97, 130.06, 128.99 |
| 8.01 (C20H)           |             | 129.19, 126.78                                   |
| 7.85 (C7H)            |             | 128.17, 124.64                                   |
| 7.78 (C6H)            |             | 128.34, 124.02                                   |
| 7.72 (C19H)           |             | 130.06, 124.64                                   |
| 7.64 (C18H)           |             | 120.64, 129.19                                   |
| 4.24 (3H, C11H)       |             | 159.07                                           |
| 4.08 (3H, C25H)       |             | 155.97                                           |
| 4.00 (3H, C24H)       |             | 165.88                                           |



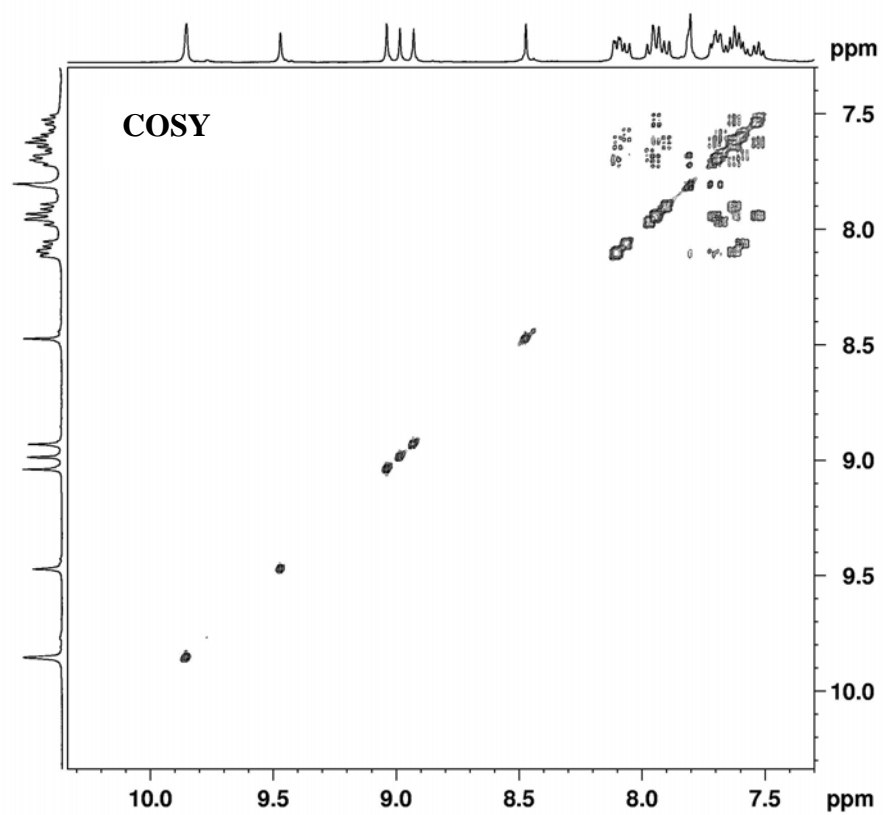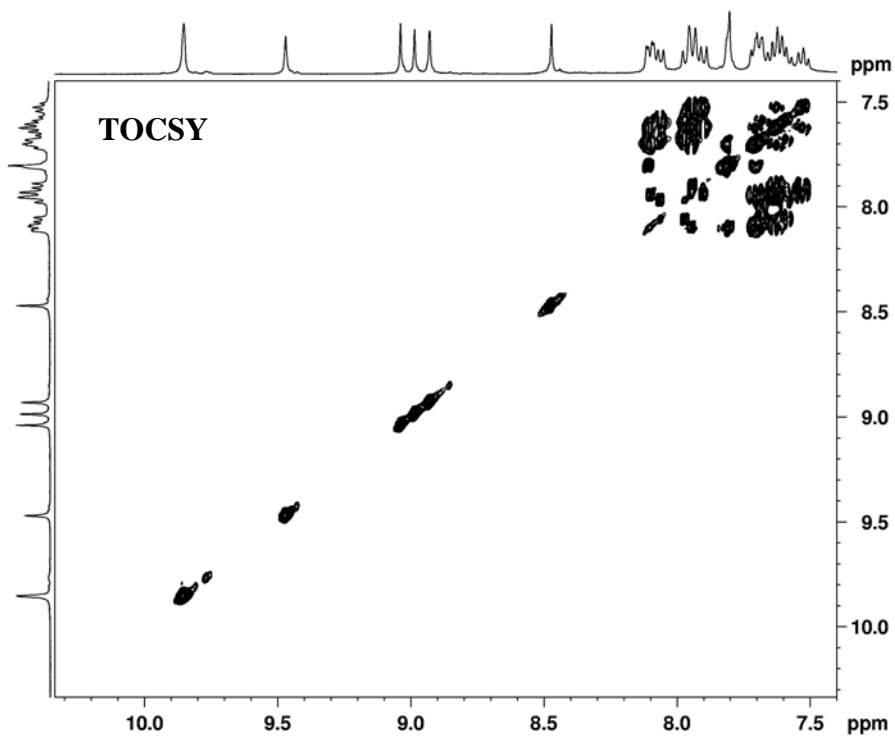

**Figure S9.** Partial 2D COSY and TOCSY spectra of **4** (400 MHz, CDCl<sub>3</sub>).

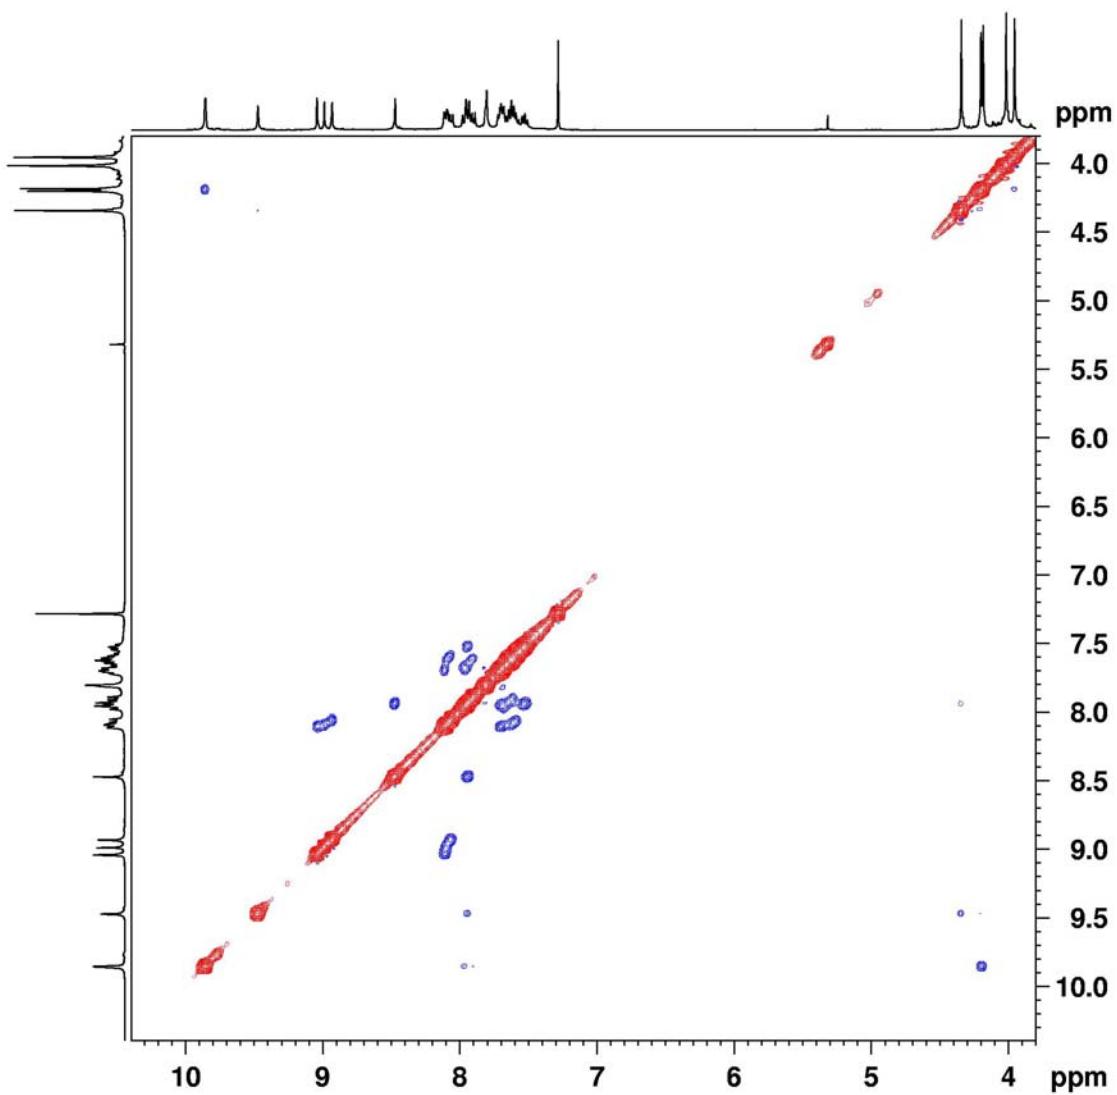

**Figure S10.** 2D NOESY spectrum of **4** (400 MHz, CDCl<sub>3</sub>).

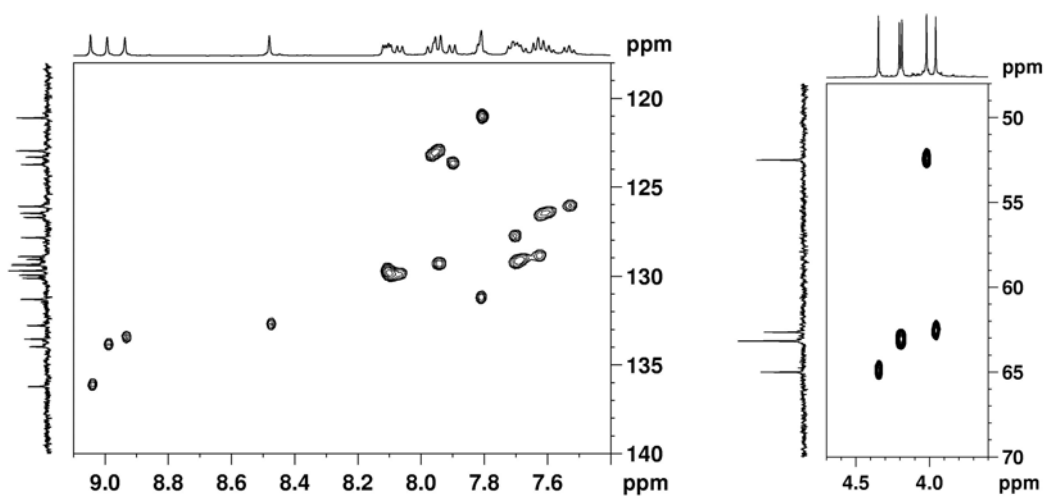

**Figure S11.** Partial HSQC spectra of **4** (400 MHz, CDCl<sub>3</sub>).

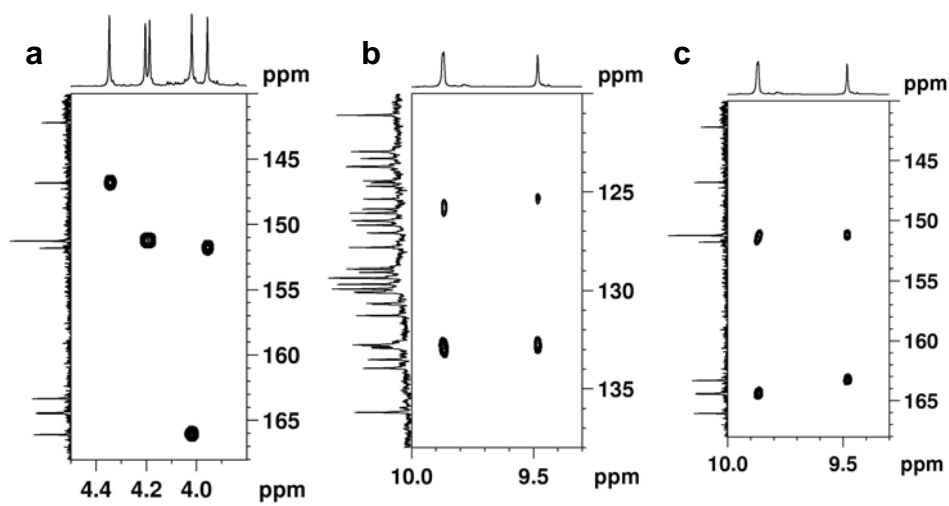

**Figure S12.** Partial HMBC spectra of **4** (400 MHz, CDCl<sub>3</sub>).

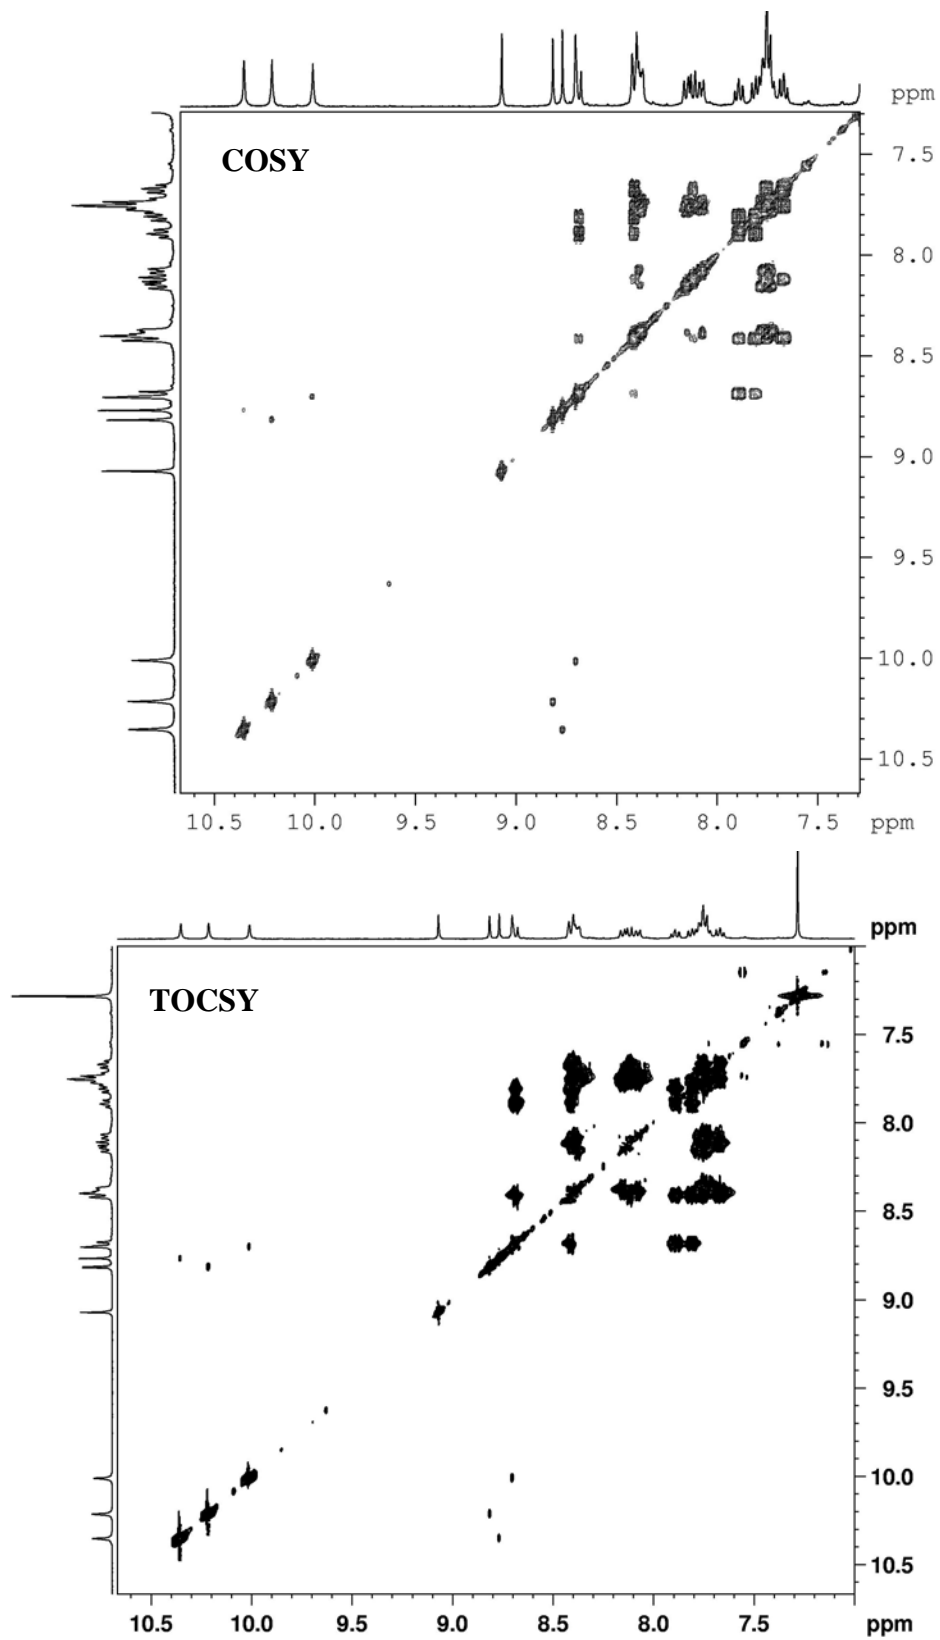

**Figure S13.** Partial 2D COSY and TOCSY spectra of **8** (400 MHz, CDCl<sub>3</sub>).

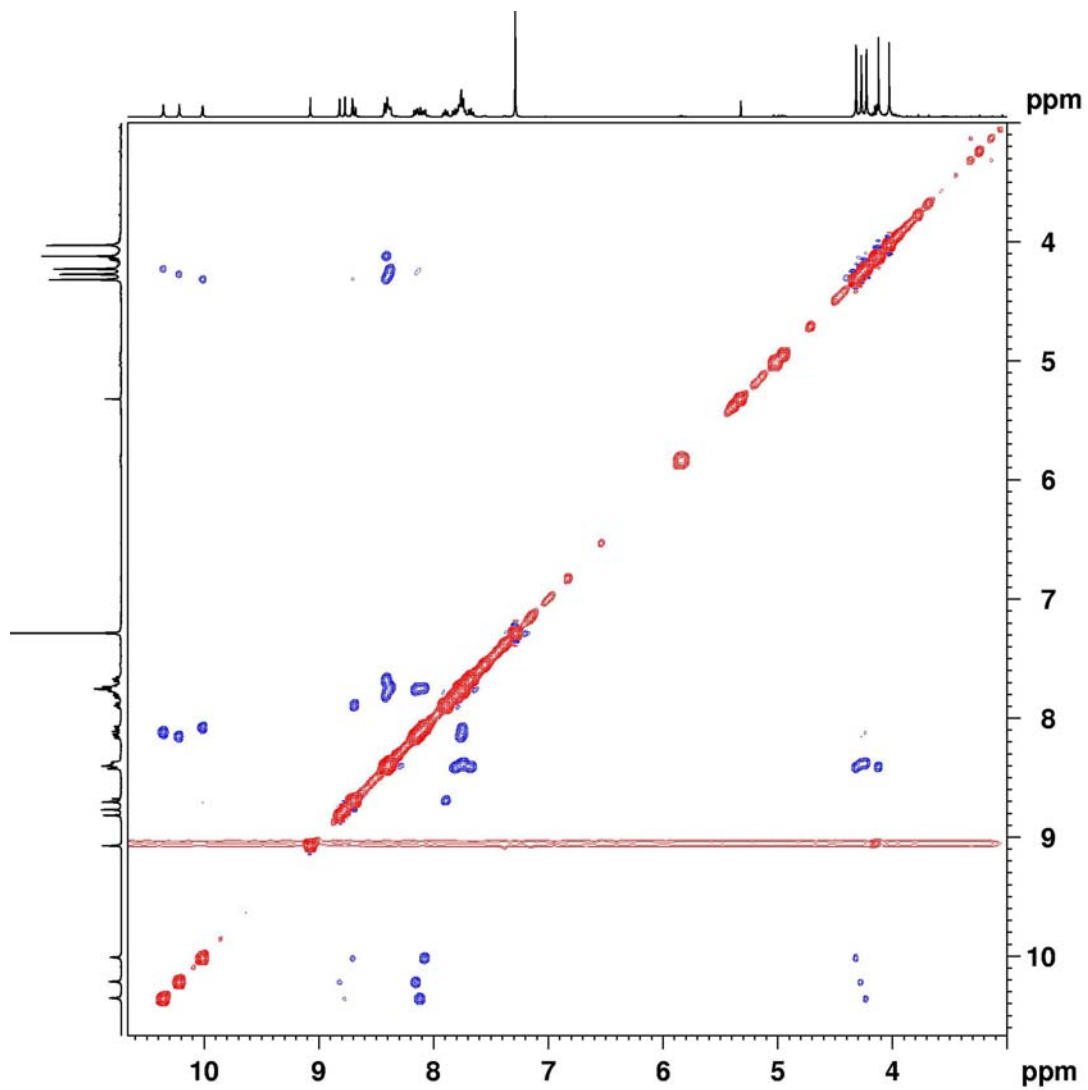

**Figure S14.** 2D NOESY spectrum of **8** (400 MHz, CDCl<sub>3</sub>).

## Quantum Chemical Calculations

The conformational structure of the oligomers **4** and **8** is considerably predetermined by the approximate anti-periplanar arrangement of the naphthyl rings and the hydrogen bonding between the amide NHs and the methoxy groups. Therefore, complete geometry optimization at the HF/6-31G\* level of *ab initio* MO theory is straightforward and confirms these conformational features. Nevertheless, conformational alternatives without hydrogen bonding were considered, but proved to be lesser stable than the hydrogen-bonded conformers. Starting the geometry optimization from more planar arrangements leads always to the approximate anti-periplanar arrangement of the naphthyl rings.

The geometry of the oligomers **4** and **8** is given as pdb-files:

Oligomer **4** ( $E_T(\text{HF}/6\text{-}31\text{G}^*) = -2918.876626$  a.u.)

```
HEADER
REMARK Oligomer 4
HETATM 1 N UNK 0001 -4.454 0.380 -0.458
HETATM 2 N UNK 0001 -0.141 -2.511 -0.950
HETATM 3 N UNK 0001 4.475 -0.770 0.836
HETATM 4 N UNK 0001 8.012 2.457 -1.334
HETATM 5 C UNK 0001 -5.381 3.839 -2.740
HETATM 6 C UNK 0001 -6.291 4.799 -2.236
HETATM 7 C UNK 0001 -6.871 4.608 -1.024
HETATM 8 C UNK 0001 -6.574 3.454 -0.253
HETATM 9 C UNK 0001 -5.670 2.498 -0.753
HETATM 10 C UNK 0001 -5.079 2.723 -2.025
HETATM 11 C UNK 0001 -7.163 3.244 1.018
HETATM 12 C UNK 0001 -6.856 2.152 1.763
HETATM 13 C UNK 0001 -5.977 1.162 1.241
HETATM 14 C UNK 0001 -5.388 1.334 0.024
HETATM 15 C UNK 0001 -4.814 -0.733 -1.140
HETATM 16 C UNK 0001 -3.708 -1.669 -1.562
HETATM 17 C UNK 0001 -2.398 -1.723 -0.999
HETATM 18 C UNK 0001 -1.448 -2.564 -1.500
HETATM 19 C UNK 0001 -7.505 2.005 3.114
HETATM 20 C UNK 0001 -2.251 -1.452 1.338
HETATM 21 C UNK 0001 -6.704 -0.966 1.940
HETATM 22 C UNK 0001 -5.359 2.265 4.179
HETATM 23 C UNK 0001 0.371 -3.491 -0.161
HETATM 24 C UNK 0001 1.668 -3.203 0.559
HETATM 25 C UNK 0001 2.540 -2.100 0.318
HETATM 26 C UNK 0001 3.639 -1.889 1.099
HETATM 27 C UNK 0001 3.958 -2.784 2.160
HETATM 28 C UNK 0001 3.127 -3.900 2.373
HETATM 29 C UNK 0001 1.986 -4.074 1.559
HETATM 30 C UNK 0001 5.081 -2.603 3.009
HETATM 31 C UNK 0001 5.351 -3.496 3.997
HETATM 32 C UNK 0001 4.522 -4.625 4.204
HETATM 33 C UNK 0001 3.436 -4.817 3.413
HETATM 34 C UNK 0001 4.084 0.498 1.133
HETATM 35 C UNK 0001 4.870 1.631 0.511
```

|        |    |   |     |      |        |        |        |
|--------|----|---|-----|------|--------|--------|--------|
| HETATM | 36 | C | UNK | 0001 | 6.178  | 1.537  | -0.050 |
| HETATM | 37 | C | UNK | 0001 | 6.695  | 2.603  | -0.716 |
| HETATM | 38 | C | UNK | 0001 | 6.017  | 3.845  | -0.854 |
| HETATM | 39 | C | UNK | 0001 | 4.759  | 3.949  | -0.232 |
| HETATM | 40 | C | UNK | 0001 | 4.214  | 2.823  | 0.428  |
| HETATM | 41 | C | UNK | 0001 | 6.545  | 4.973  | -1.534 |
| HETATM | 42 | C | UNK | 0001 | 5.839  | 6.134  | -1.574 |
| HETATM | 43 | C | UNK | 0001 | 4.573  | 6.244  | -0.950 |
| HETATM | 44 | C | UNK | 0001 | 4.047  | 5.176  | -0.299 |
| HETATM | 45 | C | UNK | 0001 | 2.840  | -1.530 | -1.943 |
| HETATM | 46 | C | UNK | 0001 | 7.634  | 0.177  | 1.215  |
| HETATM | 47 | C | UNK | 0001 | -1.748 | -3.424 | -2.597 |
| HETATM | 48 | C | UNK | 0001 | -3.050 | -3.401 | -3.130 |
| HETATM | 49 | C | UNK | 0001 | -4.006 | -2.513 | -2.589 |
| HETATM | 50 | C | UNK | 0001 | -0.790 | -4.294 | -3.181 |
| HETATM | 51 | C | UNK | 0001 | -1.129 | -5.090 | -4.228 |
| HETATM | 52 | C | UNK | 0001 | -2.442 | -5.076 | -4.758 |
| HETATM | 53 | C | UNK | 0001 | -3.375 | -4.251 | -4.221 |
| HETATM | 54 | O | UNK | 0001 | -5.953 | -0.958 | -1.452 |
| HETATM | 55 | O | UNK | 0001 | -5.718 | 0.060  | 1.987  |
| HETATM | 56 | O | UNK | 0001 | -2.058 | -0.907 | 0.040  |
| HETATM | 57 | O | UNK | 0001 | -8.685 | 1.974  | 3.234  |
| HETATM | 58 | O | UNK | 0001 | -6.735 | 1.936  | 4.192  |
| HETATM | 59 | O | UNK | 0001 | -0.182 | -4.546 | -0.009 |
| HETATM | 60 | O | UNK | 0001 | 2.270  | -1.222 | -0.686 |
| HETATM | 61 | O | UNK | 0001 | 3.131  | 0.738  | 1.817  |
| HETATM | 62 | O | UNK | 0001 | 6.884  | 0.383  | 0.021  |
| HETATM | 63 | O | UNK | 0001 | 8.061  | 2.530  | -2.523 |
| HETATM | 64 | O | UNK | 0001 | 8.951  | 2.295  | -0.618 |
| HETATM | 65 | H | UNK | 0001 | -3.506 | 0.461  | -0.167 |
| HETATM | 66 | H | UNK | 0001 | 0.266  | -1.606 | -0.867 |
| HETATM | 67 | H | UNK | 0001 | 5.255  | -0.889 | 0.229  |
| HETATM | 68 | H | UNK | 0001 | -4.929 | 3.995  | -3.703 |
| HETATM | 69 | H | UNK | 0001 | -6.520 | 5.673  | -2.818 |
| HETATM | 70 | H | UNK | 0001 | -7.566 | 5.329  | -0.630 |
| HETATM | 71 | H | UNK | 0001 | -4.393 | 1.999  | -2.418 |
| HETATM | 72 | H | UNK | 0001 | -7.857 | 3.970  | 1.402  |
| HETATM | 73 | H | UNK | 0001 | -1.725 | -0.804 | 2.023  |
| HETATM | 74 | H | UNK | 0001 | -1.848 | -2.454 | 1.395  |
| HETATM | 75 | H | UNK | 0001 | -3.304 | -1.466 | 1.587  |
| HETATM | 76 | H | UNK | 0001 | -6.332 | -1.766 | 2.562  |
| HETATM | 77 | H | UNK | 0001 | -7.647 | -0.613 | 2.335  |
| HETATM | 78 | H | UNK | 0001 | -6.838 | -1.311 | 0.925  |
| HETATM | 79 | H | UNK | 0001 | -5.081 | 2.371  | 5.217  |
| HETATM | 80 | H | UNK | 0001 | -4.779 | 1.477  | 3.726  |
| HETATM | 81 | H | UNK | 0001 | -5.184 | 3.201  | 3.666  |
| HETATM | 82 | H | UNK | 0001 | 1.336  | -4.910 | 1.731  |
| HETATM | 83 | H | UNK | 0001 | 5.709  | -1.746 | 2.868  |
| HETATM | 84 | H | UNK | 0001 | 6.203  | -3.345 | 4.635  |
| HETATM | 85 | H | UNK | 0001 | 4.754  | -5.319 | 4.991  |
| HETATM | 86 | H | UNK | 0001 | 2.792  | -5.665 | 3.562  |
| HETATM | 87 | H | UNK | 0001 | 3.238  | 2.891  | 0.866  |
| HETATM | 88 | H | UNK | 0001 | 7.495  | 4.908  | -2.026 |
| HETATM | 89 | H | UNK | 0001 | 6.247  | 6.984  | -2.090 |
| HETATM | 90 | H | UNK | 0001 | 4.036  | 7.172  | -0.999 |

|         |     |    |     |      |        |        |        |
|---------|-----|----|-----|------|--------|--------|--------|
| HETATM  | 91  | H  | UNK | 0001 | 3.086  | 5.241  | 0.178  |
| HETATM  | 92  | H  | UNK | 0001 | 2.531  | -0.748 | -2.620 |
| HETATM  | 93  | H  | UNK | 0001 | 3.920  | -1.549 | -1.880 |
| HETATM  | 94  | H  | UNK | 0001 | 2.483  | -2.485 | -2.307 |
| HETATM  | 95  | H  | UNK | 0001 | 8.047  | -0.817 | 1.138  |
| HETATM  | 96  | H  | UNK | 0001 | 8.426  | 0.904  | 1.284  |
| HETATM  | 97  | H  | UNK | 0001 | 6.989  | 0.241  | 2.082  |
| HETATM  | 98  | H  | UNK | 0001 | -4.996 | -2.484 | -3.002 |
| HETATM  | 99  | H  | UNK | 0001 | 0.204  | -4.326 | -2.783 |
| HETATM  | 100 | H  | UNK | 0001 | -0.394 | -5.746 | -4.659 |
| HETATM  | 101 | H  | UNK | 0001 | -2.690 | -5.718 | -5.583 |
| HETATM  | 102 | H  | UNK | 0001 | -4.376 | -4.225 | -4.614 |
| CONNECT | 1   | 14 | 15  | 65   |        |        |        |
| CONNECT | 2   | 18 | 23  | 66   |        |        |        |
| CONNECT | 3   | 26 | 34  | 67   |        |        |        |
| CONNECT | 4   | 37 | 63  | 64   |        |        |        |
| CONNECT | 5   | 6  | 10  | 68   |        |        |        |
| CONNECT | 6   | 5  | 7   | 69   |        |        |        |
| CONNECT | 7   | 6  | 8   | 70   |        |        |        |
| CONNECT | 8   | 7  | 9   | 11   |        |        |        |
| CONNECT | 9   | 8  | 10  | 14   |        |        |        |
| CONNECT | 10  | 5  | 9   | 71   |        |        |        |
| CONNECT | 11  | 8  | 12  | 72   |        |        |        |
| CONNECT | 12  | 11 | 13  | 19   |        |        |        |
| CONNECT | 13  | 12 | 14  | 55   |        |        |        |
| CONNECT | 14  | 1  | 9   | 13   |        |        |        |
| CONNECT | 15  | 1  | 16  | 54   |        |        |        |
| CONNECT | 16  | 15 | 17  | 49   |        |        |        |
| CONNECT | 17  | 16 | 18  | 56   |        |        |        |
| CONNECT | 18  | 2  | 17  | 47   |        |        |        |
| CONNECT | 19  | 12 | 57  | 58   |        |        |        |
| CONNECT | 20  | 56 | 73  | 74   | 75     |        |        |
| CONNECT | 21  | 55 | 76  | 77   | 78     |        |        |
| CONNECT | 22  | 58 | 79  | 80   | 81     |        |        |
| CONNECT | 23  | 2  | 24  | 59   |        |        |        |
| CONNECT | 24  | 23 | 25  | 29   |        |        |        |
| CONNECT | 25  | 24 | 26  | 60   |        |        |        |
| CONNECT | 26  | 3  | 25  | 27   |        |        |        |
| CONNECT | 27  | 26 | 28  | 30   |        |        |        |
| CONNECT | 28  | 27 | 29  | 33   |        |        |        |
| CONNECT | 29  | 24 | 28  | 82   |        |        |        |
| CONNECT | 30  | 27 | 31  | 83   |        |        |        |
| CONNECT | 31  | 30 | 32  | 84   |        |        |        |
| CONNECT | 32  | 31 | 33  | 85   |        |        |        |
| CONNECT | 33  | 28 | 32  | 86   |        |        |        |
| CONNECT | 34  | 3  | 35  | 61   |        |        |        |
| CONNECT | 35  | 34 | 36  | 40   |        |        |        |
| CONNECT | 36  | 35 | 37  | 62   |        |        |        |
| CONNECT | 37  | 4  | 36  | 38   |        |        |        |
| CONNECT | 38  | 37 | 39  | 41   |        |        |        |
| CONNECT | 39  | 38 | 40  | 44   |        |        |        |
| CONNECT | 40  | 35 | 39  | 87   |        |        |        |
| CONNECT | 41  | 38 | 42  | 88   |        |        |        |
| CONNECT | 42  | 41 | 43  | 89   |        |        |        |
| CONNECT | 43  | 42 | 44  | 90   |        |        |        |



|         |    |    |    |     |    |
|---------|----|----|----|-----|----|
| CONNECT | 44 | 39 | 43 | 91  |    |
| CONNECT | 45 | 60 | 92 | 93  | 94 |
| CONNECT | 46 | 62 | 95 | 96  | 97 |
| CONNECT | 47 | 18 | 48 | 50  |    |
| CONNECT | 48 | 47 | 49 | 53  |    |
| CONNECT | 49 | 16 | 48 | 98  |    |
| CONNECT | 50 | 47 | 51 | 99  |    |
| CONNECT | 51 | 50 | 52 | 100 |    |
| CONNECT | 52 | 51 | 53 | 101 |    |
| CONNECT | 53 | 48 | 52 | 102 |    |
| CONNECT | 54 | 15 |    |     |    |
| CONNECT | 55 | 13 | 21 |     |    |
| CONNECT | 56 | 17 | 20 |     |    |
| CONNECT | 57 | 19 |    |     |    |
| CONNECT | 58 | 19 | 22 |     |    |
| CONNECT | 59 | 23 |    |     |    |
| CONNECT | 60 | 25 | 45 |     |    |
| CONNECT | 61 | 34 |    |     |    |
| CONNECT | 62 | 36 | 46 |     |    |
| CONNECT | 63 | 4  |    |     |    |
| CONNECT | 64 | 4  |    |     |    |
| CONNECT | 65 | 1  |    |     |    |
| CONNECT | 66 | 2  |    |     |    |
| CONNECT | 67 | 3  |    |     |    |
| CONNECT | 68 | 5  |    |     |    |
| CONNECT | 69 | 6  |    |     |    |
| CONNECT | 70 | 7  |    |     |    |
| CONNECT | 71 | 10 |    |     |    |
| CONNECT | 72 | 11 |    |     |    |
| CONNECT | 73 | 20 |    |     |    |
| CONNECT | 74 | 20 |    |     |    |
| CONNECT | 75 | 20 |    |     |    |
| CONNECT | 76 | 21 |    |     |    |
| CONNECT | 77 | 21 |    |     |    |
| CONNECT | 78 | 21 |    |     |    |
| CONNECT | 79 | 22 |    |     |    |
| CONNECT | 80 | 22 |    |     |    |
| CONNECT | 81 | 22 |    |     |    |
| CONNECT | 82 | 29 |    |     |    |
| CONNECT | 83 | 30 |    |     |    |
| CONNECT | 84 | 31 |    |     |    |
| CONNECT | 85 | 32 |    |     |    |
| CONNECT | 86 | 33 |    |     |    |
| CONNECT | 87 | 40 |    |     |    |
| CONNECT | 88 | 41 |    |     |    |
| CONNECT | 89 | 42 |    |     |    |
| CONNECT | 90 | 43 |    |     |    |
| CONNECT | 91 | 44 |    |     |    |
| CONNECT | 92 | 45 |    |     |    |
| CONNECT | 93 | 45 |    |     |    |
| CONNECT | 94 | 45 |    |     |    |
| CONNECT | 95 | 46 |    |     |    |
| CONNECT | 96 | 46 |    |     |    |
| CONNECT | 97 | 46 |    |     |    |
| CONNECT | 98 | 49 |    |     |    |

```

CONNECT 99 50
CONNECT 100 51
CONNECT 101 52
CONNECT 102 53
END

```

Oligomer 8 ( $E_T(\text{HF}/6\text{-}31\text{G}^*) = -2918.899241 \text{ a.u.}$ )

```

HEADER
REMARK Oligomer 8
HETATM 1 N UNK 0001 5.907 0.389 0.937
HETATM 2 N UNK 0001 0.345 -1.987 0.369
HETATM 3 N UNK 0001 -5.256 -0.117 -1.066
HETATM 4 N UNK 0001 -10.659 0.259 1.647
HETATM 5 C UNK 0001 6.253 4.582 0.124
HETATM 6 C UNK 0001 7.363 5.063 -0.605
HETATM 7 C UNK 0001 8.319 4.198 -1.035
HETATM 8 C UNK 0001 8.218 2.810 -0.755
HETATM 9 C UNK 0001 7.097 2.328 -0.052
HETATM 10 C UNK 0001 6.120 3.256 0.389
HETATM 11 C UNK 0001 9.242 1.906 -1.178
HETATM 12 C UNK 0001 9.111 0.563 -0.947
HETATM 13 C UNK 0001 7.954 0.088 -0.268
HETATM 14 C UNK 0001 6.991 0.923 0.185
HETATM 15 C UNK 0001 4.655 0.240 0.431
HETATM 16 C UNK 0001 3.657 -0.540 1.252
HETATM 17 C UNK 0001 3.792 -0.924 2.555
HETATM 18 C UNK 0001 2.797 -1.729 3.191
HETATM 19 C UNK 0001 1.633 -2.085 2.485
HETATM 20 C UNK 0001 1.484 -1.625 1.140
HETATM 21 C UNK 0001 2.466 -0.897 0.562
HETATM 22 C UNK 0001 10.134 -0.419 -1.411
HETATM 23 C UNK 0001 10.514 -2.667 -1.926
HETATM 24 C UNK 0001 2.982 -2.207 4.516
HETATM 25 C UNK 0001 2.042 -2.991 5.105
HETATM 26 C UNK 0001 0.867 -3.338 4.401
HETATM 27 C UNK 0001 0.669 -2.901 3.130
HETATM 28 C UNK 0001 4.761 0.608 4.052
HETATM 29 C UNK 0001 -0.881 -1.434 0.564
HETATM 30 C UNK 0001 -1.947 -1.709 -0.469
HETATM 31 C UNK 0001 -3.113 -0.903 -0.352
HETATM 32 C UNK 0001 -4.146 -0.997 -1.218
HETATM 33 C UNK 0001 -4.083 -1.912 -2.313
HETATM 34 C UNK 0001 -2.944 -2.730 -2.437
HETATM 35 C UNK 0001 -1.892 -2.628 -1.476
HETATM 36 C UNK 0001 -5.106 -2.019 -3.289
HETATM 37 C UNK 0001 -4.987 -2.885 -4.329
HETATM 38 C UNK 0001 -3.837 -3.696 -4.461
HETATM 39 C UNK 0001 -2.843 -3.620 -3.539
HETATM 40 C UNK 0001 -6.471 -0.535 -0.628
HETATM 41 C UNK 0001 -0.944 -4.725 -0.990
HETATM 42 C UNK 0001 -7.489 0.522 -0.271
HETATM 43 C UNK 0001 -8.613 0.043 0.447
HETATM 44 C UNK 0001 -9.581 0.880 0.883

```

|        |    |   |     |      |         |        |        |
|--------|----|---|-----|------|---------|--------|--------|
| HETATM | 45 | C | UNK | 0001 | -9.543  | 2.289  | 0.638  |
| HETATM | 46 | C | UNK | 0001 | -8.436  | 2.765  | -0.098 |
| HETATM | 47 | C | UNK | 0001 | -7.430  | 1.858  | -0.554 |
| HETATM | 48 | C | UNK | 0001 | -10.539 | 3.221  | 1.034  |
| HETATM | 49 | C | UNK | 0001 | -10.407 | 4.541  | 0.733  |
| HETATM | 50 | C | UNK | 0001 | -9.280  | 5.022  | 0.035  |
| HETATM | 51 | C | UNK | 0001 | -8.319  | 4.153  | -0.371 |
| HETATM | 52 | C | UNK | 0001 | -6.587  | 2.439  | -2.675 |
| HETATM | 53 | C | UNK | 0001 | 11.423  | 2.788  | -1.096 |
| HETATM | 54 | O | UNK | 0001 | 4.336   | 0.692  | -0.634 |
| HETATM | 55 | O | UNK | 0001 | 11.271  | -0.179 | -1.667 |
| HETATM | 56 | O | UNK | 0001 | 9.631   | -1.644 | -1.502 |
| HETATM | 57 | O | UNK | 0001 | 4.886   | -0.585 | 3.298  |
| HETATM | 58 | O | UNK | 0001 | -1.127  | -0.739 | 1.511  |
| HETATM | 59 | O | UNK | 0001 | -0.827  | -3.466 | -1.630 |
| HETATM | 60 | O | UNK | 0001 | -6.754  | -1.694 | -0.512 |
| HETATM | 61 | O | UNK | 0001 | -6.402  | 2.385  | -1.267 |
| HETATM | 62 | O | UNK | 0001 | -11.162 | 0.889  | 2.529  |
| HETATM | 63 | O | UNK | 0001 | -10.961 | -0.860 | 1.363  |
| HETATM | 64 | O | UNK | 0001 | 10.285  | 2.428  | -1.856 |
| HETATM | 65 | H | UNK | 0001 | 5.501   | 5.273  | 0.461  |
| HETATM | 66 | H | UNK | 0001 | 7.444   | 6.112  | -0.824 |
| HETATM | 67 | H | UNK | 0001 | 9.156   | 4.550  | -1.605 |
| HETATM | 68 | H | UNK | 0001 | 5.262   | 2.898  | 0.922  |
| HETATM | 69 | H | UNK | 0001 | 7.851   | -0.966 | -0.108 |
| HETATM | 70 | H | UNK | 0001 | 6.128   | -0.111 | 1.768  |
| HETATM | 71 | H | UNK | 0001 | 2.362   | -0.556 | -0.449 |
| HETATM | 72 | H | UNK | 0001 | 9.930   | -3.573 | -1.936 |
| HETATM | 73 | H | UNK | 0001 | 11.344  | -2.761 | -1.241 |
| HETATM | 74 | H | UNK | 0001 | 10.892  | -2.453 | -2.916 |
| HETATM | 75 | H | UNK | 0001 | 3.886   | -1.960 | 5.037  |
| HETATM | 76 | H | UNK | 0001 | 2.191   | -3.355 | 6.106  |
| HETATM | 77 | H | UNK | 0001 | 0.127   | -3.956 | 4.877  |
| HETATM | 78 | H | UNK | 0001 | -0.226  | -3.165 | 2.605  |
| HETATM | 79 | H | UNK | 0001 | 0.512   | -2.427 | -0.507 |
| HETATM | 80 | H | UNK | 0001 | 3.907   | 0.555  | 4.715  |
| HETATM | 81 | H | UNK | 0001 | 4.658   | 1.464  | 3.397  |
| HETATM | 82 | H | UNK | 0001 | 5.667   | 0.700  | 4.632  |
| HETATM | 83 | H | UNK | 0001 | -3.153  | -0.212 | 0.467  |
| HETATM | 84 | H | UNK | 0001 | -5.983  | -1.411 | -3.195 |
| HETATM | 85 | H | UNK | 0001 | -5.771  | -2.954 | -5.062 |
| HETATM | 86 | H | UNK | 0001 | -3.751  | -4.367 | -5.296 |
| HETATM | 87 | H | UNK | 0001 | -1.958  | -4.216 | -3.646 |
| HETATM | 88 | H | UNK | 0001 | -5.053  | 0.854  | -0.992 |
| HETATM | 89 | H | UNK | 0001 | -0.064  | -5.288 | -1.260 |
| HETATM | 90 | H | UNK | 0001 | -1.830  | -5.245 | -1.329 |
| HETATM | 91 | H | UNK | 0001 | -0.984  | -4.603 | 0.085  |
| HETATM | 92 | H | UNK | 0001 | -8.677  | -1.007 | 0.641  |
| HETATM | 93 | H | UNK | 0001 | -11.392 | 2.885  | 1.582  |
| HETATM | 94 | H | UNK | 0001 | -11.171 | 5.231  | 1.043  |
| HETATM | 95 | H | UNK | 0001 | -9.184  | 6.072  | -0.170 |
| HETATM | 96 | H | UNK | 0001 | -7.450  | 4.506  | -0.889 |
| HETATM | 97 | H | UNK | 0001 | -5.715  | 2.933  | -3.075 |
| HETATM | 98 | H | UNK | 0001 | -7.475  | 3.006  | -2.921 |
| HETATM | 99 | H | UNK | 0001 | -6.663  | 1.442  | -3.086 |

|         |     |    |     |      |        |       |        |
|---------|-----|----|-----|------|--------|-------|--------|
| HETATM  | 100 | H  | UNK | 0001 | 12.139 | 3.183 | -1.801 |
| HETATM  | 101 | H  | UNK | 0001 | 11.841 | 1.926 | -0.602 |
| HETATM  | 102 | H  | UNK | 0001 | 11.169 | 3.552 | -0.370 |
| CONNECT | 1   | 14 | 15  | 70   |        |       |        |
| CONNECT | 2   | 20 | 29  | 79   |        |       |        |
| CONNECT | 3   | 32 | 40  | 88   |        |       |        |
| CONNECT | 4   | 44 | 62  | 63   |        |       |        |
| CONNECT | 5   | 6  | 10  | 65   |        |       |        |
| CONNECT | 6   | 5  | 7   | 66   |        |       |        |
| CONNECT | 7   | 6  | 8   | 67   |        |       |        |
| CONNECT | 8   | 7  | 9   | 11   |        |       |        |
| CONNECT | 9   | 8  | 10  | 14   |        |       |        |
| CONNECT | 10  | 5  | 9   | 68   |        |       |        |
| CONNECT | 11  | 8  | 12  | 64   |        |       |        |
| CONNECT | 12  | 11 | 13  | 22   |        |       |        |
| CONNECT | 13  | 12 | 14  | 69   |        |       |        |
| CONNECT | 14  | 1  | 9   | 13   |        |       |        |
| CONNECT | 15  | 1  | 16  | 54   |        |       |        |
| CONNECT | 16  | 15 | 17  | 21   |        |       |        |
| CONNECT | 17  | 16 | 18  | 57   |        |       |        |
| CONNECT | 18  | 17 | 19  | 24   |        |       |        |
| CONNECT | 19  | 18 | 20  | 27   |        |       |        |
| CONNECT | 20  | 2  | 19  | 21   |        |       |        |
| CONNECT | 21  | 16 | 20  | 71   |        |       |        |
| CONNECT | 22  | 12 | 55  | 56   |        |       |        |
| CONNECT | 23  | 56 | 72  | 73   | 74     |       |        |
| CONNECT | 24  | 18 | 25  | 75   |        |       |        |
| CONNECT | 25  | 24 | 26  | 76   |        |       |        |
| CONNECT | 26  | 25 | 27  | 77   |        |       |        |
| CONNECT | 27  | 19 | 26  | 78   |        |       |        |
| CONNECT | 28  | 57 | 80  | 81   | 82     |       |        |
| CONNECT | 29  | 2  | 30  | 58   |        |       |        |
| CONNECT | 30  | 29 | 31  | 35   |        |       |        |
| CONNECT | 31  | 30 | 32  | 83   |        |       |        |
| CONNECT | 32  | 3  | 31  | 33   |        |       |        |
| CONNECT | 33  | 32 | 34  | 36   |        |       |        |
| CONNECT | 34  | 33 | 35  | 39   |        |       |        |
| CONNECT | 35  | 30 | 34  | 59   |        |       |        |
| CONNECT | 36  | 33 | 37  | 84   |        |       |        |
| CONNECT | 37  | 36 | 38  | 85   |        |       |        |
| CONNECT | 38  | 37 | 39  | 86   |        |       |        |
| CONNECT | 39  | 34 | 38  | 87   |        |       |        |
| CONNECT | 40  | 3  | 42  | 60   |        |       |        |
| CONNECT | 41  | 59 | 89  | 90   | 91     |       |        |
| CONNECT | 42  | 40 | 43  | 47   |        |       |        |
| CONNECT | 43  | 42 | 44  | 92   |        |       |        |
| CONNECT | 44  | 4  | 43  | 45   |        |       |        |
| CONNECT | 45  | 44 | 46  | 48   |        |       |        |
| CONNECT | 46  | 45 | 47  | 51   |        |       |        |
| CONNECT | 47  | 42 | 46  | 61   |        |       |        |
| CONNECT | 48  | 45 | 49  | 93   |        |       |        |
| CONNECT | 49  | 48 | 50  | 94   |        |       |        |
| CONNECT | 50  | 49 | 51  | 95   |        |       |        |
| CONNECT | 51  | 46 | 50  | 96   |        |       |        |
| CONNECT | 52  | 61 | 97  | 98   | 99     |       |        |

|         |     |    |     |     |     |
|---------|-----|----|-----|-----|-----|
| CONNECT | 53  | 64 | 100 | 101 | 102 |
| CONNECT | 54  | 15 |     |     |     |
| CONNECT | 55  | 22 |     |     |     |
| CONNECT | 56  | 22 | 23  |     |     |
| CONNECT | 57  | 17 | 28  |     |     |
| CONNECT | 58  | 29 |     |     |     |
| CONNECT | 59  | 35 | 41  |     |     |
| CONNECT | 60  | 40 |     |     |     |
| CONNECT | 61  | 47 | 52  |     |     |
| CONNECT | 62  | 4  |     |     |     |
| CONNECT | 63  | 4  |     |     |     |
| CONNECT | 64  | 11 | 53  |     |     |
| CONNECT | 65  | 5  |     |     |     |
| CONNECT | 66  | 6  |     |     |     |
| CONNECT | 67  | 7  |     |     |     |
| CONNECT | 68  | 10 |     |     |     |
| CONNECT | 69  | 13 |     |     |     |
| CONNECT | 70  | 1  |     |     |     |
| CONNECT | 71  | 21 |     |     |     |
| CONNECT | 72  | 23 |     |     |     |
| CONNECT | 73  | 23 |     |     |     |
| CONNECT | 74  | 23 |     |     |     |
| CONNECT | 75  | 24 |     |     |     |
| CONNECT | 76  | 25 |     |     |     |
| CONNECT | 77  | 26 |     |     |     |
| CONNECT | 78  | 27 |     |     |     |
| CONNECT | 79  | 2  |     |     |     |
| CONNECT | 80  | 28 |     |     |     |
| CONNECT | 81  | 28 |     |     |     |
| CONNECT | 82  | 28 |     |     |     |
| CONNECT | 83  | 31 |     |     |     |
| CONNECT | 84  | 36 |     |     |     |
| CONNECT | 85  | 37 |     |     |     |
| CONNECT | 86  | 38 |     |     |     |
| CONNECT | 87  | 39 |     |     |     |
| CONNECT | 88  | 3  |     |     |     |
| CONNECT | 89  | 41 |     |     |     |
| CONNECT | 90  | 41 |     |     |     |
| CONNECT | 91  | 41 |     |     |     |
| CONNECT | 92  | 43 |     |     |     |
| CONNECT | 93  | 48 |     |     |     |
| CONNECT | 94  | 49 |     |     |     |
| CONNECT | 95  | 50 |     |     |     |
| CONNECT | 96  | 51 |     |     |     |
| CONNECT | 97  | 52 |     |     |     |
| CONNECT | 98  | 52 |     |     |     |
| CONNECT | 99  | 52 |     |     |     |
| CONNECT | 100 | 53 |     |     |     |
| CONNECT | 101 | 53 |     |     |     |
| CONNECT | 102 | 53 |     |     |     |
| END     |     |    |     |     |     |
